# Supplementary material for: Prevalence, determinants, and impact on general health and working capacity of post-acute sequelae of COVID-19 six to 12 months after infection: a population-based retrospective cohort study from southern Germany
Source: bioRxiv or medRxiv preprint supplement (doi:10.1101/2022.03.14.22272316), 2022-03-15
Supplement: Supplementary file [file media-1.pdf]

**Content**

Figure S1. Flow chart for the inclusion of SARS-CoV-2 PCR-positive subjects (tested between 1<sup>st</sup> October 2020 and 1<sup>st</sup> April 2021) aged 18-65 years from defined regions in southern Germany. ....2

Figure S2. Prevalence of symptoms before (pre), during, and 6-12 months after (current) after the SARS-CoV-2 infection, including prevalence ratio (current divided by pre) and prevalence difference (current minus pre) with 95 % confidence intervals according to age categories and sex. N represents the number of respondents in the respective age strata. ....3

Figure S3. Frequency of symptoms 6-12 months after acute infection, given the symptom was not present before the infection, stratified according to sex with grade of impairment (top panel) and medical treatment (bottom panel). ....13

Figure S4. Co-occurrence network of symptom clusters 6-12 months after SARS-CoV-2 infection (with prevalence in %), given the symptoms were not present before the infection, along with contributing individual symptoms of grade moderate to strong ..... 14

Table S1. Fatigue assessment scale (FAS) scores by new (not present before the infection) self-reported fatigue (as most prevalent symptom cluster) ..... 15

Figure S5. Pairwise agreement (Cohen's kappa) between symptom clusters (left panel) and conditional probability (right panel) of experiencing symptoms of a specific cluster (columns) given another specific symptom cluster (rows). The overall prevalence of a specific symptom cluster is included in diagonal cells. ....15

Table S2. Mutually adjusted prevalence ratios with 95% confidence intervals for new symptom clusters .....16

Table S3. Mutually adjusted prevalence ratios with 95% confidence intervals for new symptom clusters with grade of impairment moderate to strong .....18

Figure S6. Attributable percentage loss of general health (left panel) and working capacity (right panel), stratified by age categories and sex. ....20

Figure S7. Pairwise Pearson`s correlation coefficient between measures of recovered general health, working capacity, physical and mental health score (SF-12), and fatigue assessment. ....21

Table S8. Participation according to age and sex. ....21

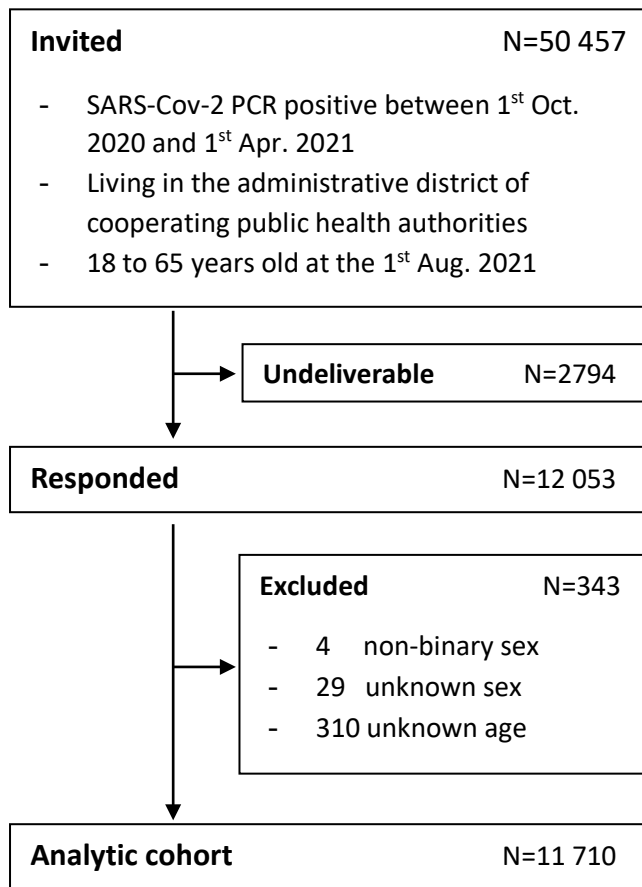

**Figure S1. Flow chart for the inclusion of SARS-CoV-2 PCR-positive subjects (tested between 1<sup>st</sup> October 2020 and 1<sup>st</sup> April 2021) aged 18-65 years from defined regions in southern Germany.**

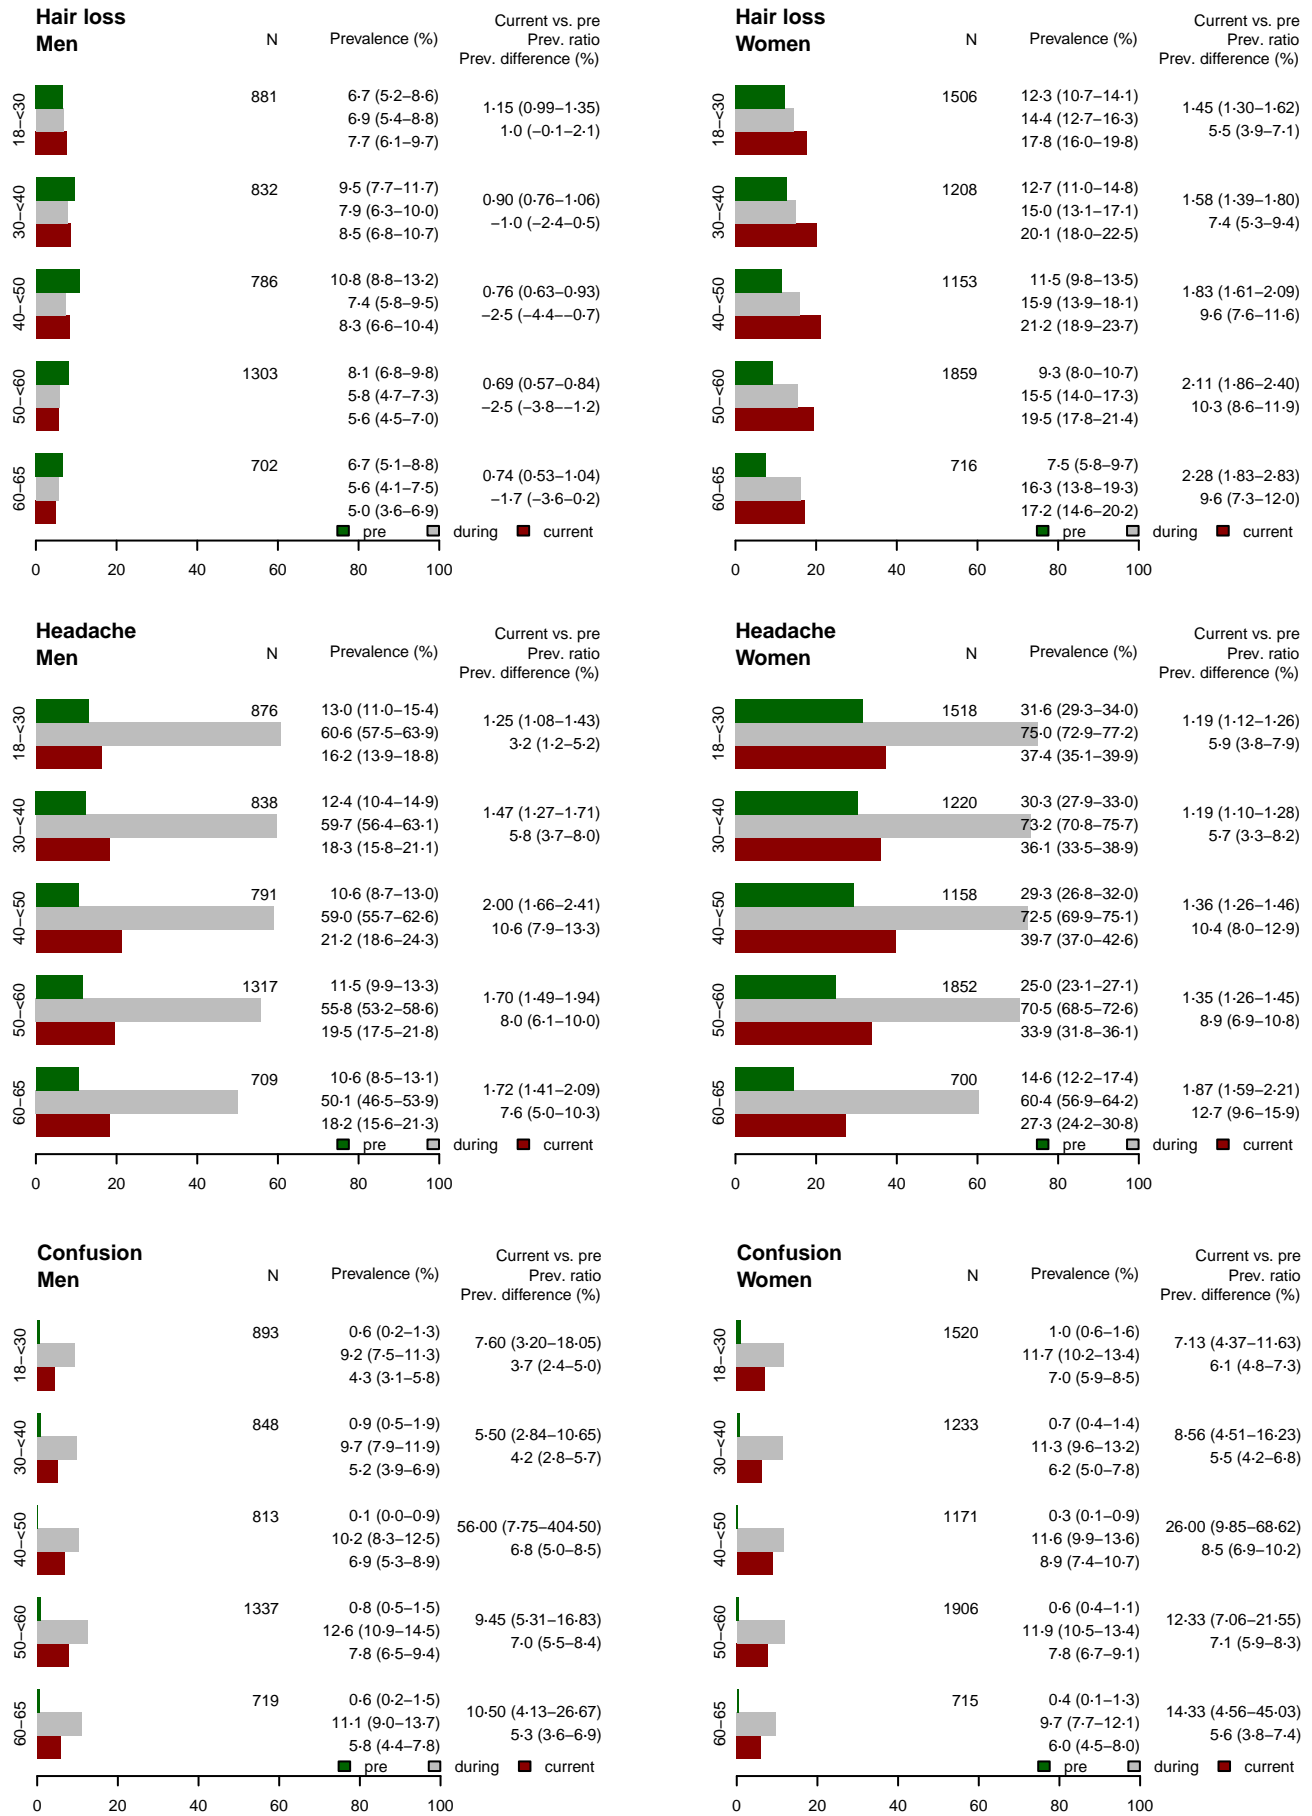

**Figure S2. Prevalence of symptoms before (pre), during, and 6-12 months after (current) after the SARS-CoV-2 infection, including prevalence ratio (current divided by pre) and prevalence difference (current minus pre) with 95 % confidence intervals according to age categories and sex. N represents the number of respondents in the respective age strata.**

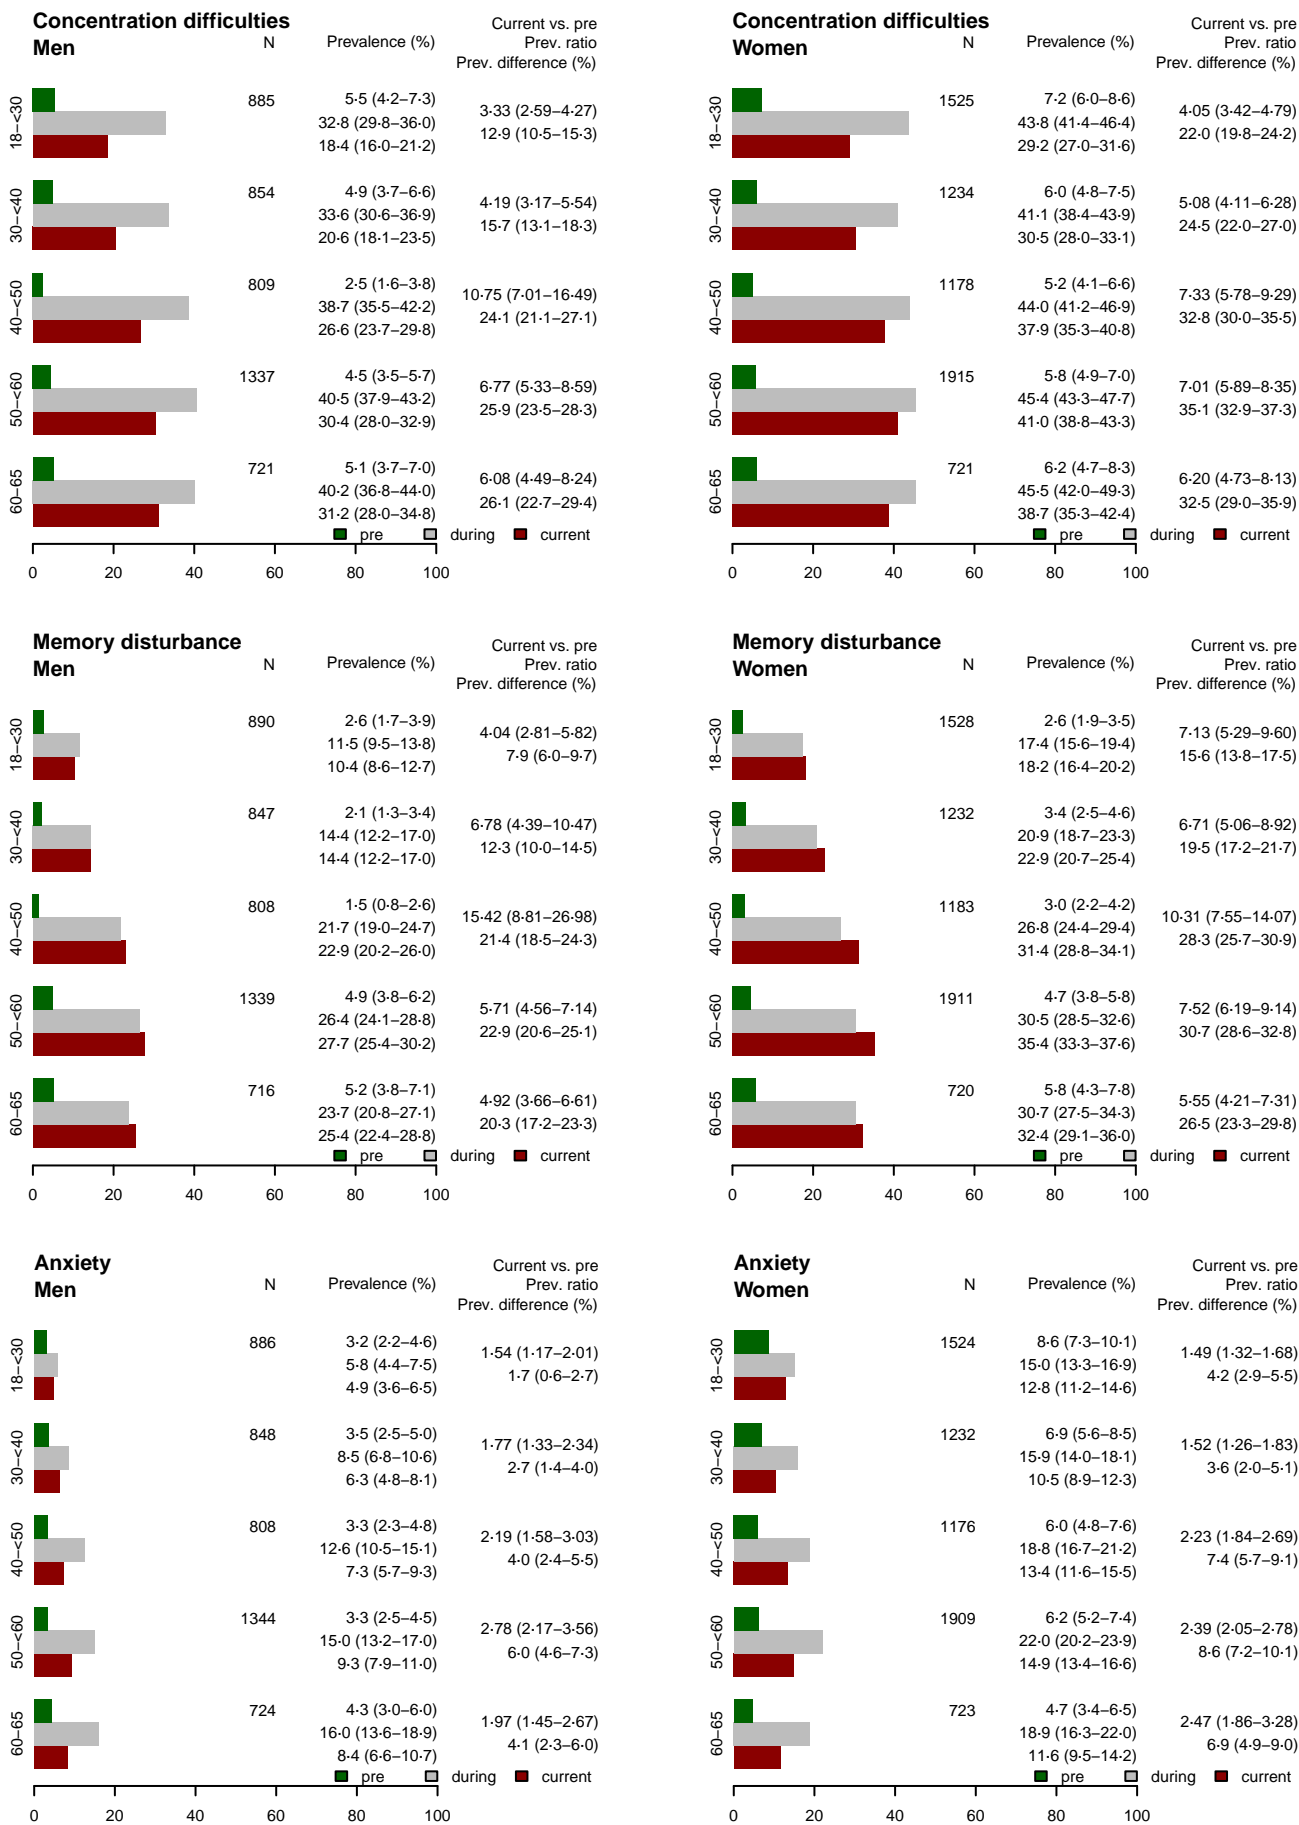

**Figure S2. Prevalence of symptoms before (pre), during, and 6-12 months after (current) after the SARS-CoV-2 infection, including prevalence ratio (current divided by pre) and prevalence difference (current minus pre) with 95 % confidence intervals according to age categories and sex. N represents the number of respondents in the respective age strata. (...continued)**

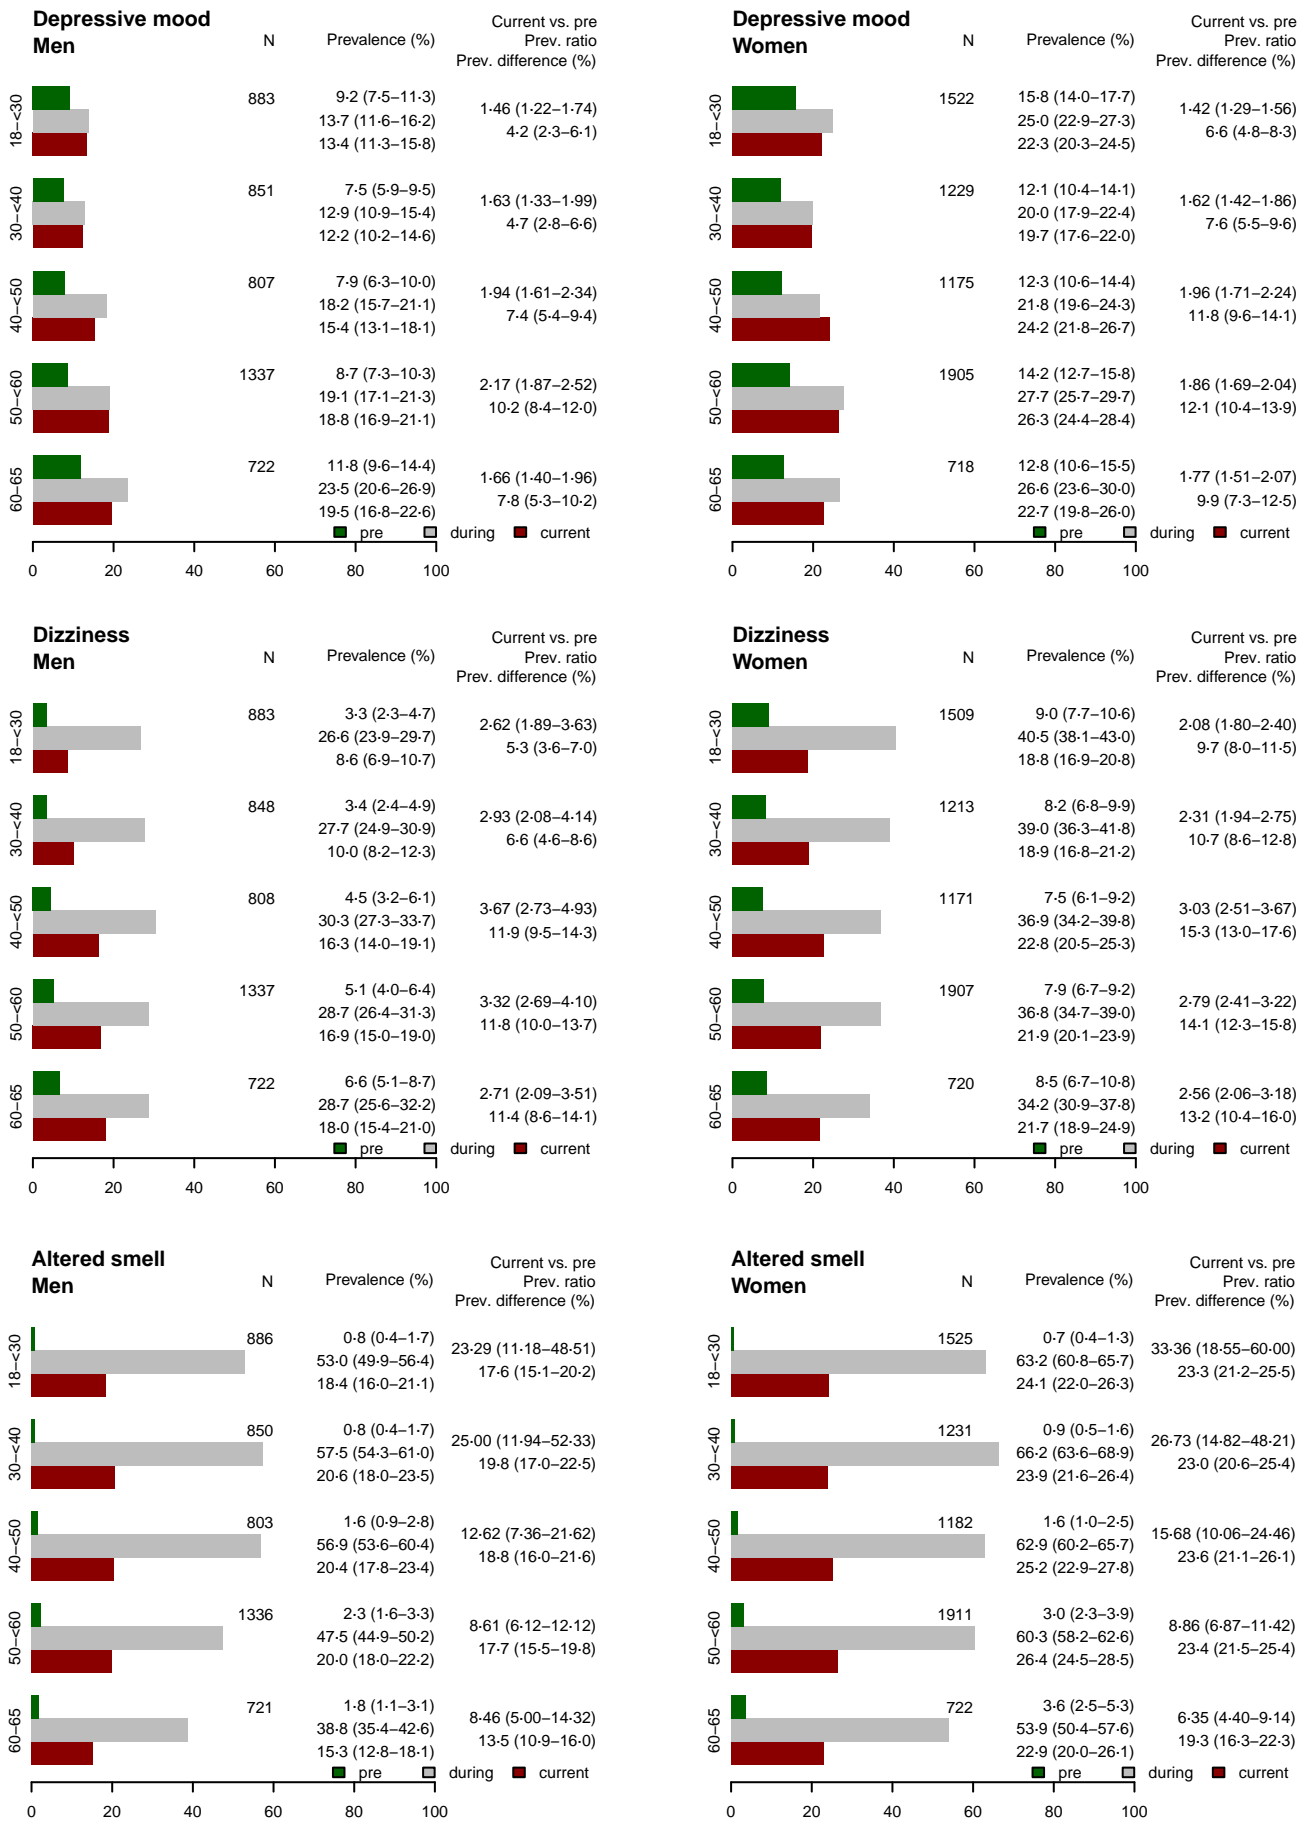

**Figure S2. Prevalence of symptoms before (pre), during, and 6-12 months after (current) after the SARS-CoV-2 infection, including prevalence ratio (current divided by pre) and prevalence difference (current minus pre) with 95 % confidence intervals according to age categories and sex. N represents the number of respondents in the respective age strata. (...continued)**

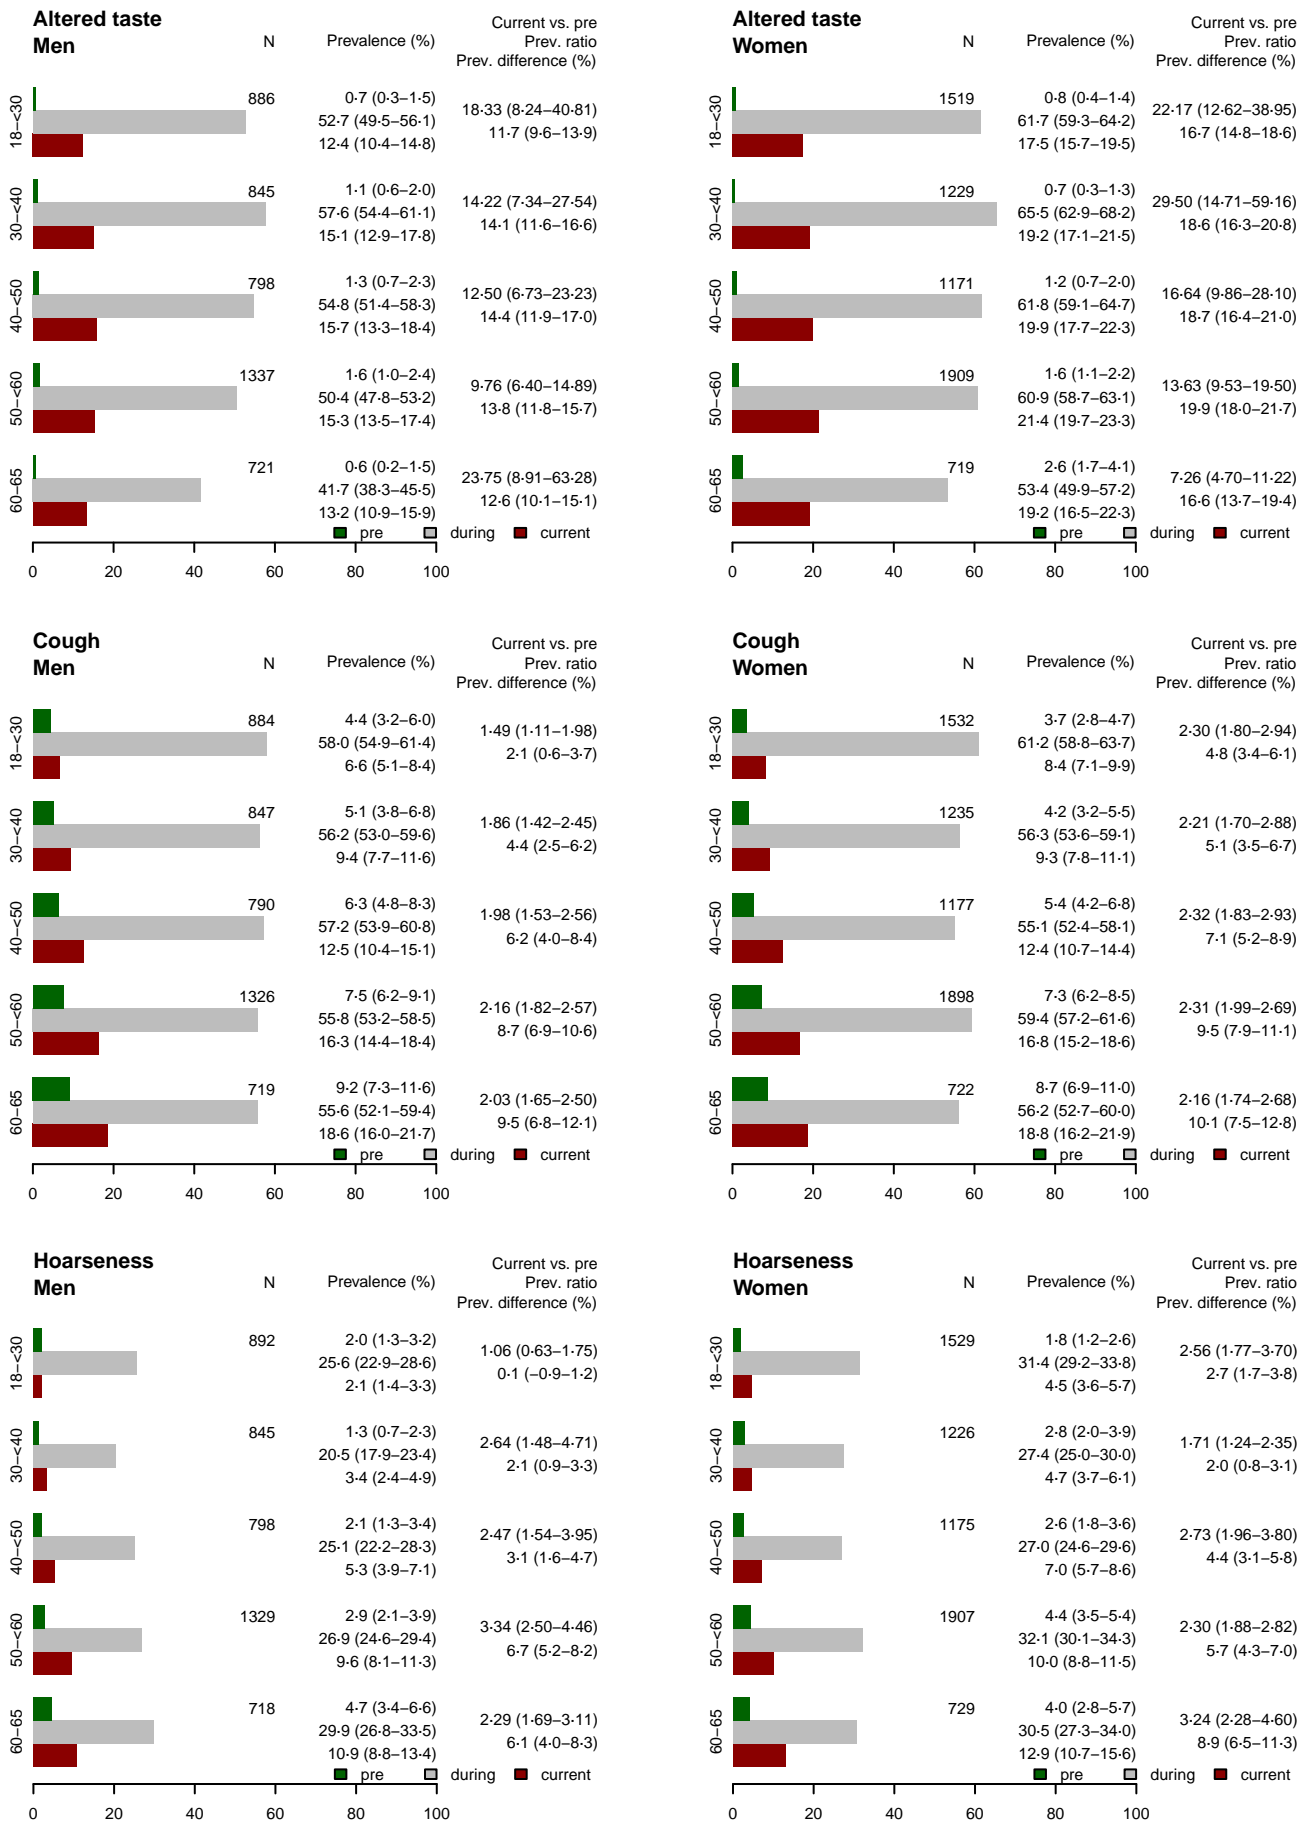

**Figure S2. Prevalence of symptoms before (pre), during, and 6-12 months after (current) after the SARS-CoV-2 infection, including prevalence ratio (current divided by pre) and prevalence difference (current minus pre) with 95 % confidence intervals according to age categories and sex. N represents the number of respondents in the respective age strata. (...continued)**

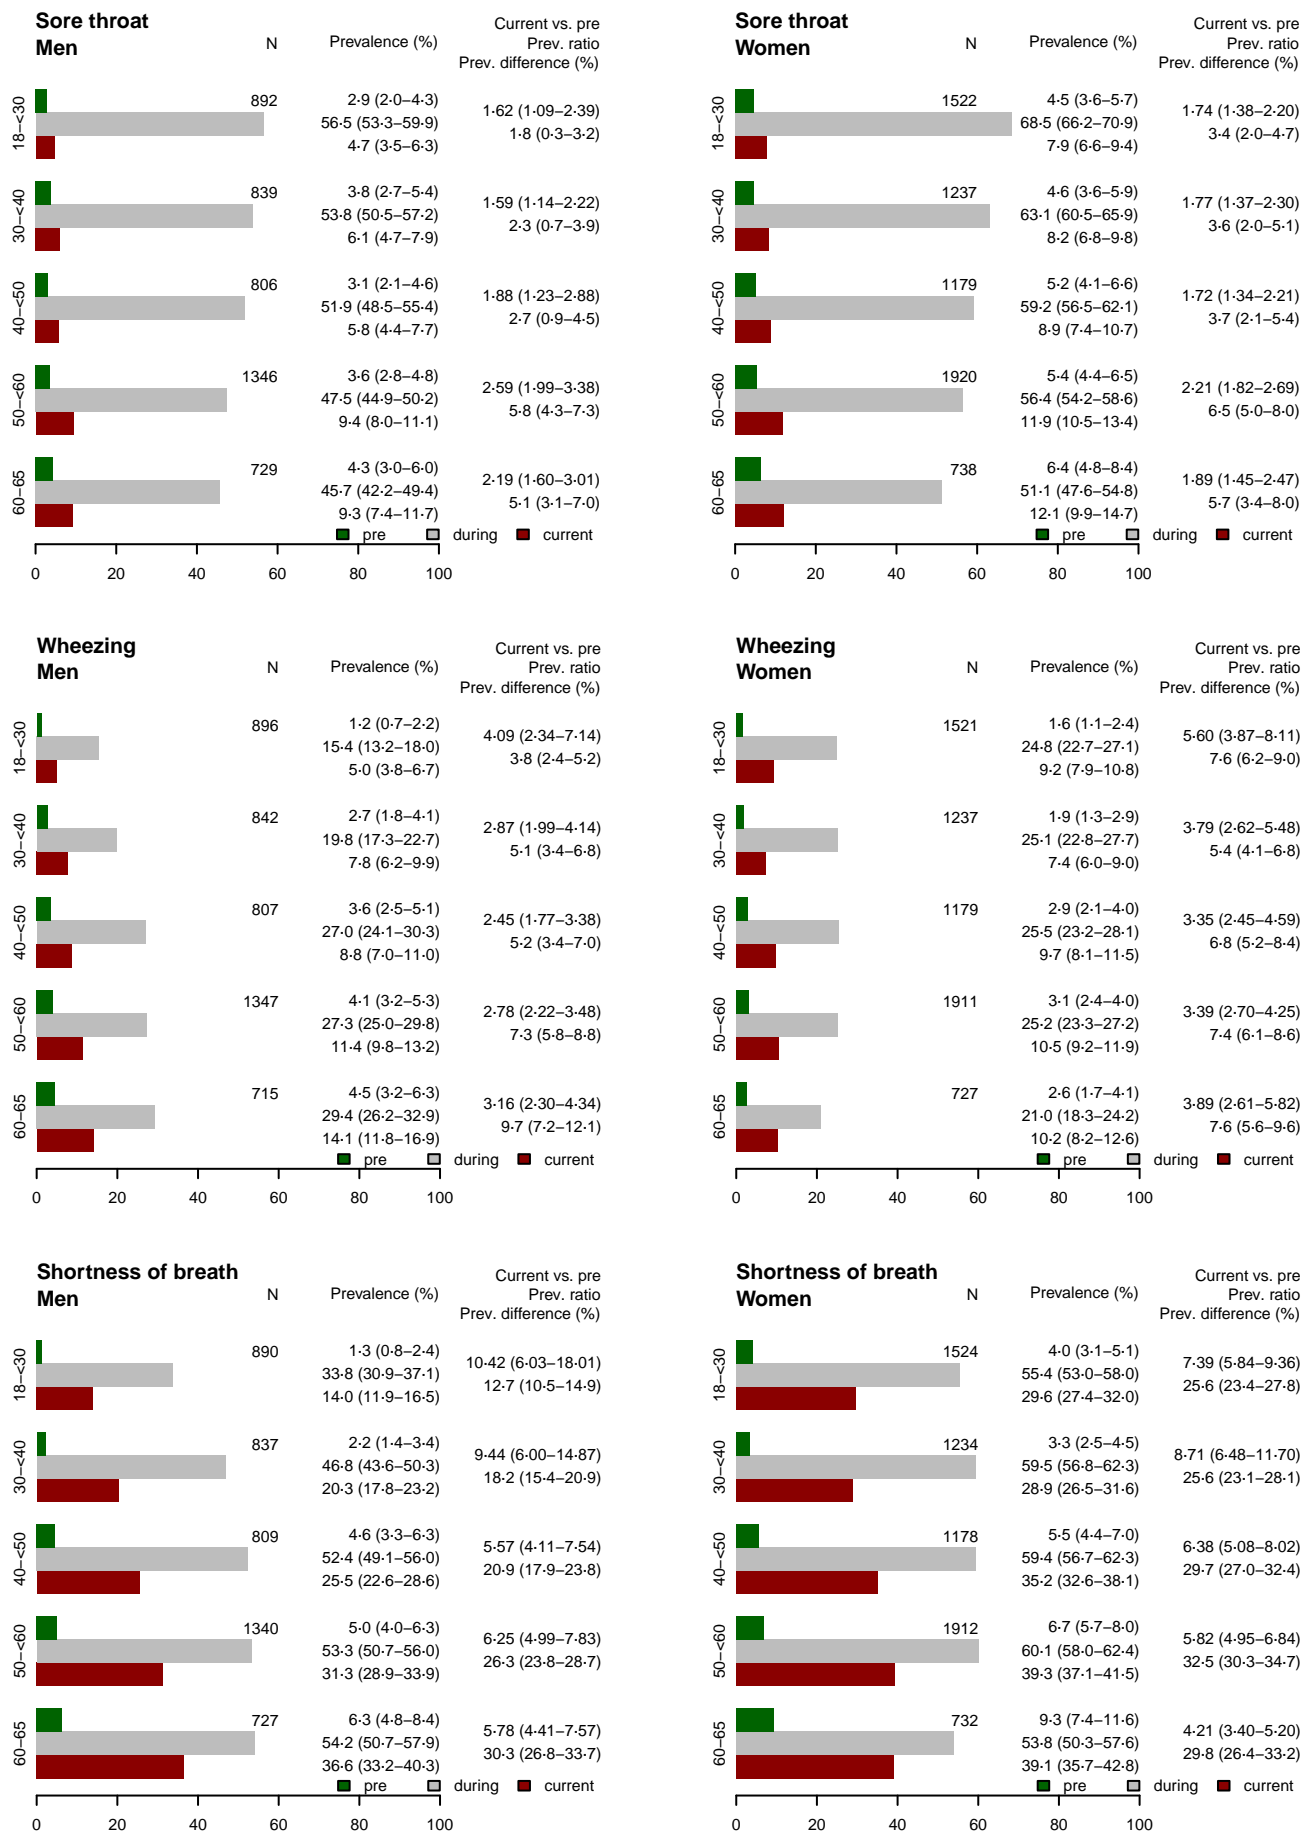

**Figure S2. Prevalence of symptoms before (pre), during, and 6-12 months after (current) after the SARS-CoV-2 infection, including prevalence ratio (current divided by pre) and prevalence difference (current minus pre) with 95 % confidence intervals according to age categories and sex. N represents the number of respondents in the respective age strata. (...continued)**

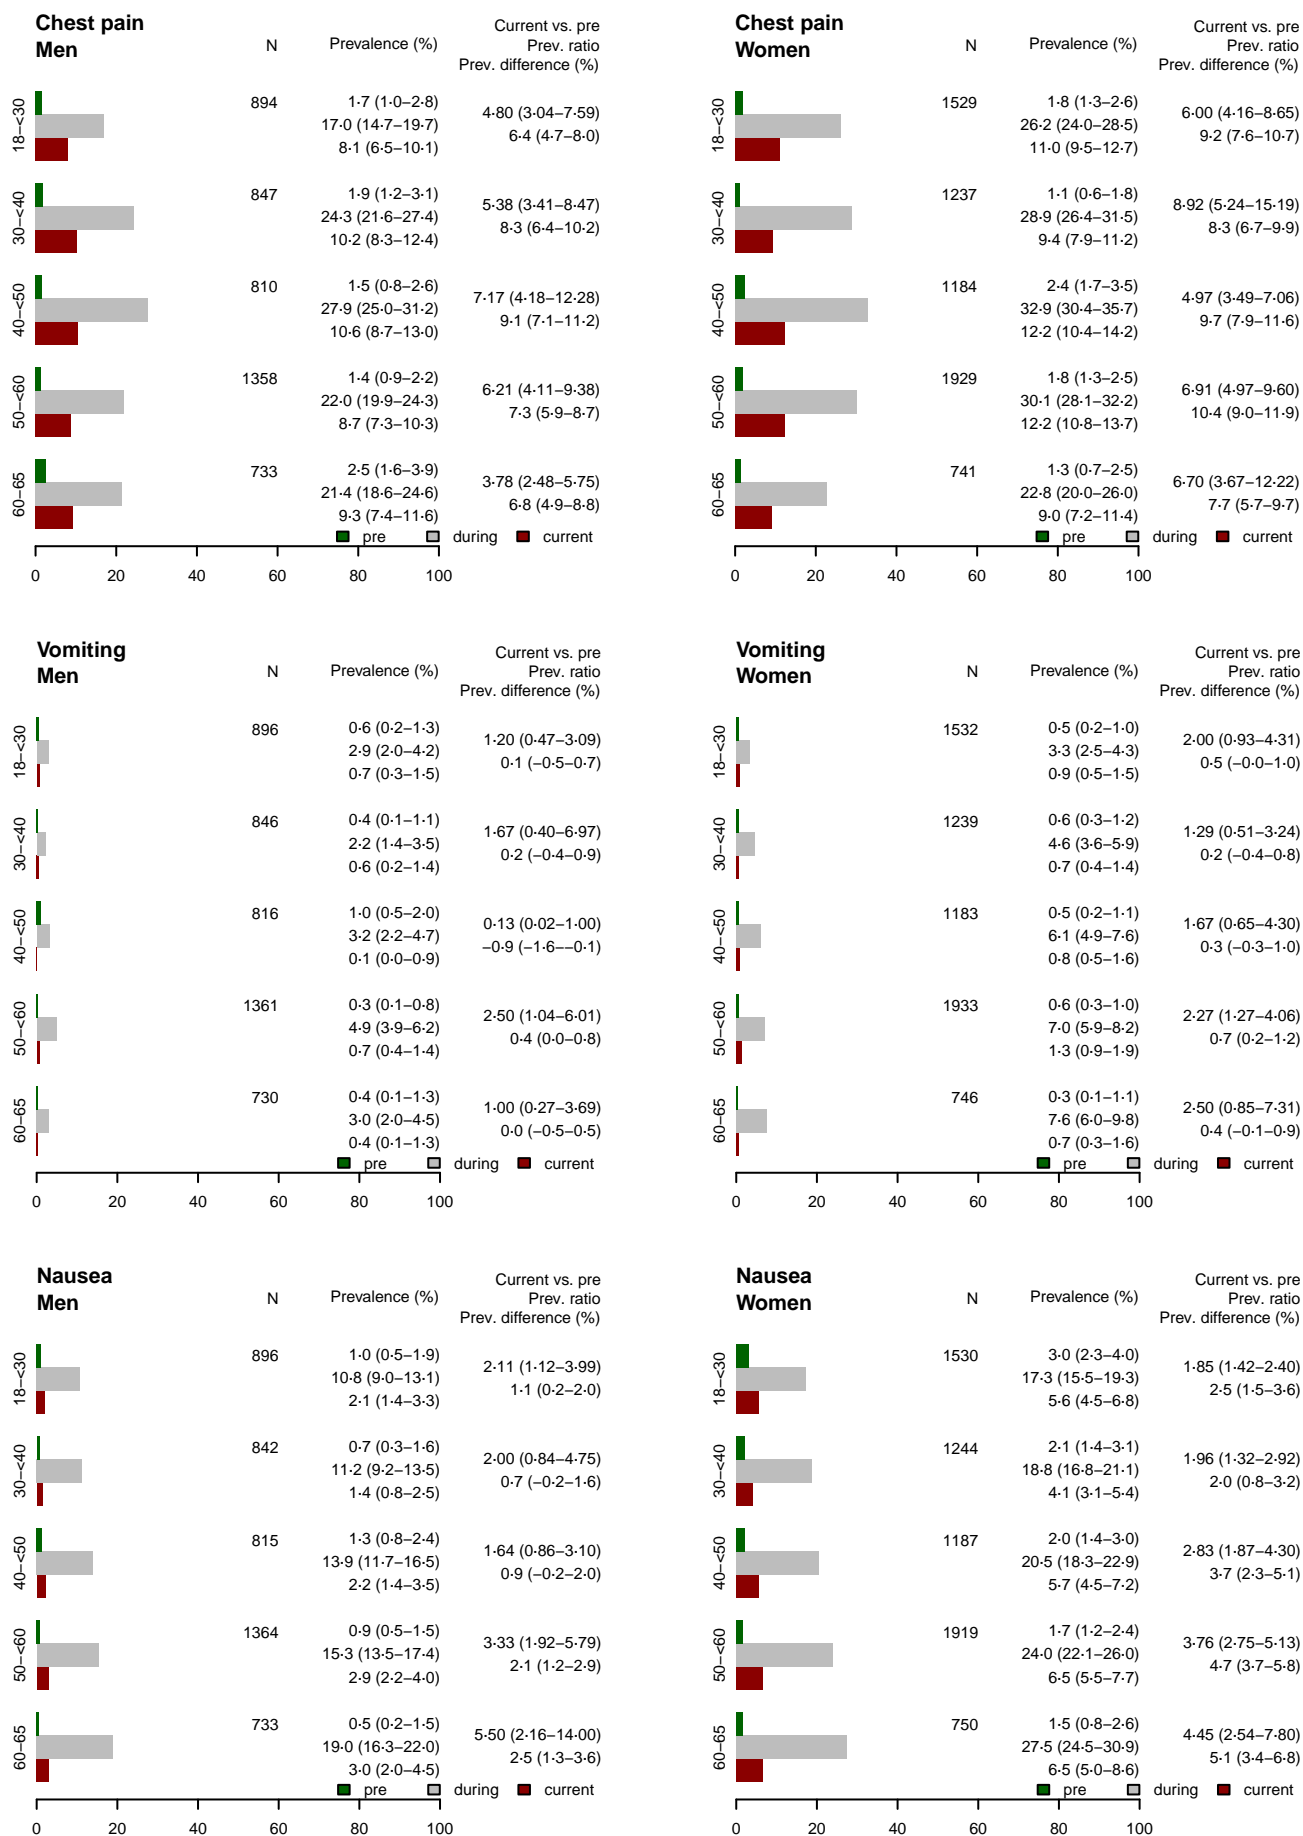

**Figure S2. Prevalence of symptoms before (pre), during, and 6-12 months after (current) after the SARS-CoV-2 infection, including prevalence ratio (current divided by pre) and prevalence difference (current minus pre) with 95 % confidence intervals according to age categories and sex. N represents the number of respondents in the respective age strata. (...continued)**



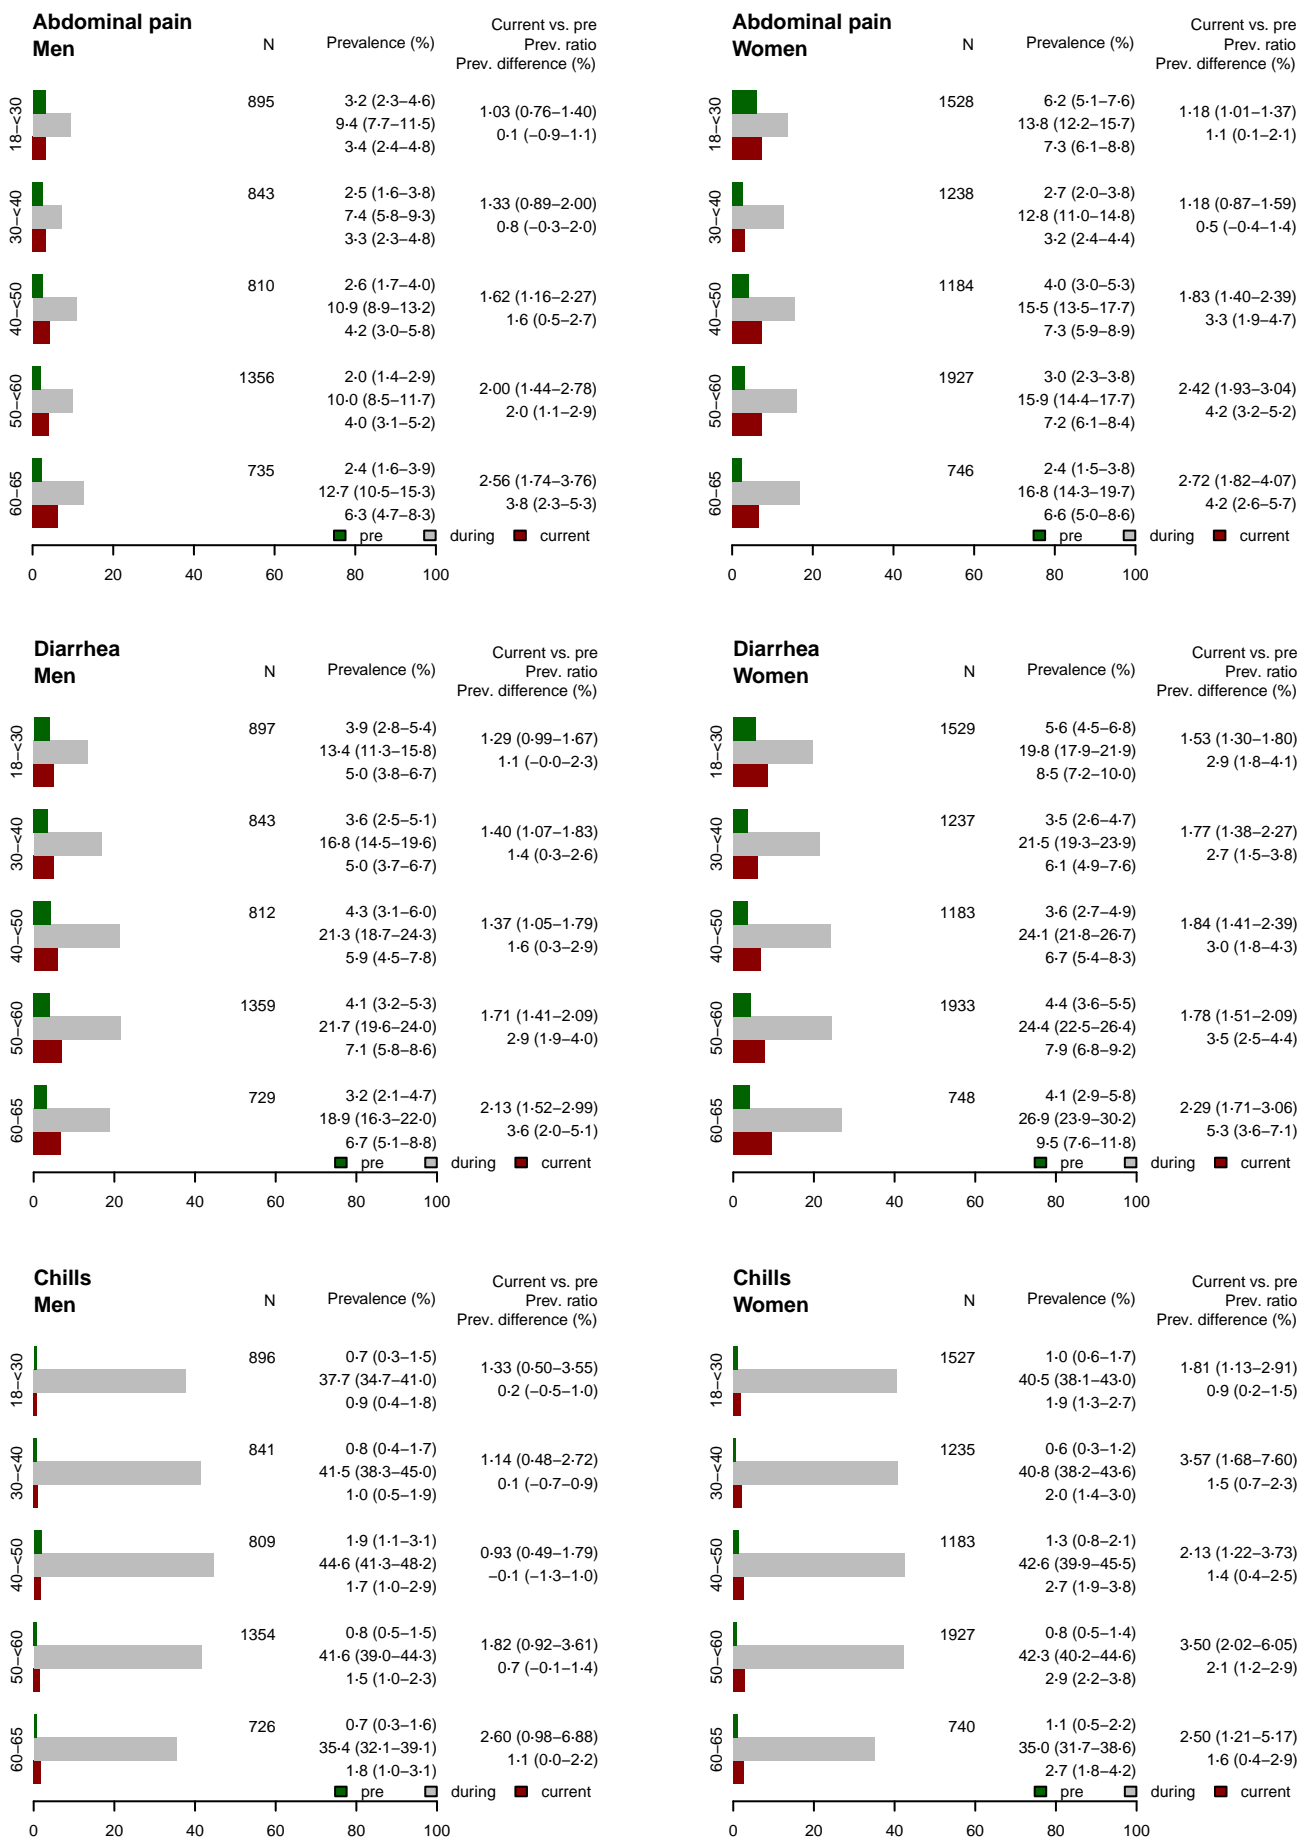

**Figure S2. Prevalence of symptoms before (pre), during, and 6-12 months after (current) after the SARS-CoV-2 infection, including prevalence ratio (current divided by pre) and prevalence difference (current minus pre) with 95 % confidence intervals according to age categories and sex. N represents the number of respondents in the respective age strata. (...continued)**

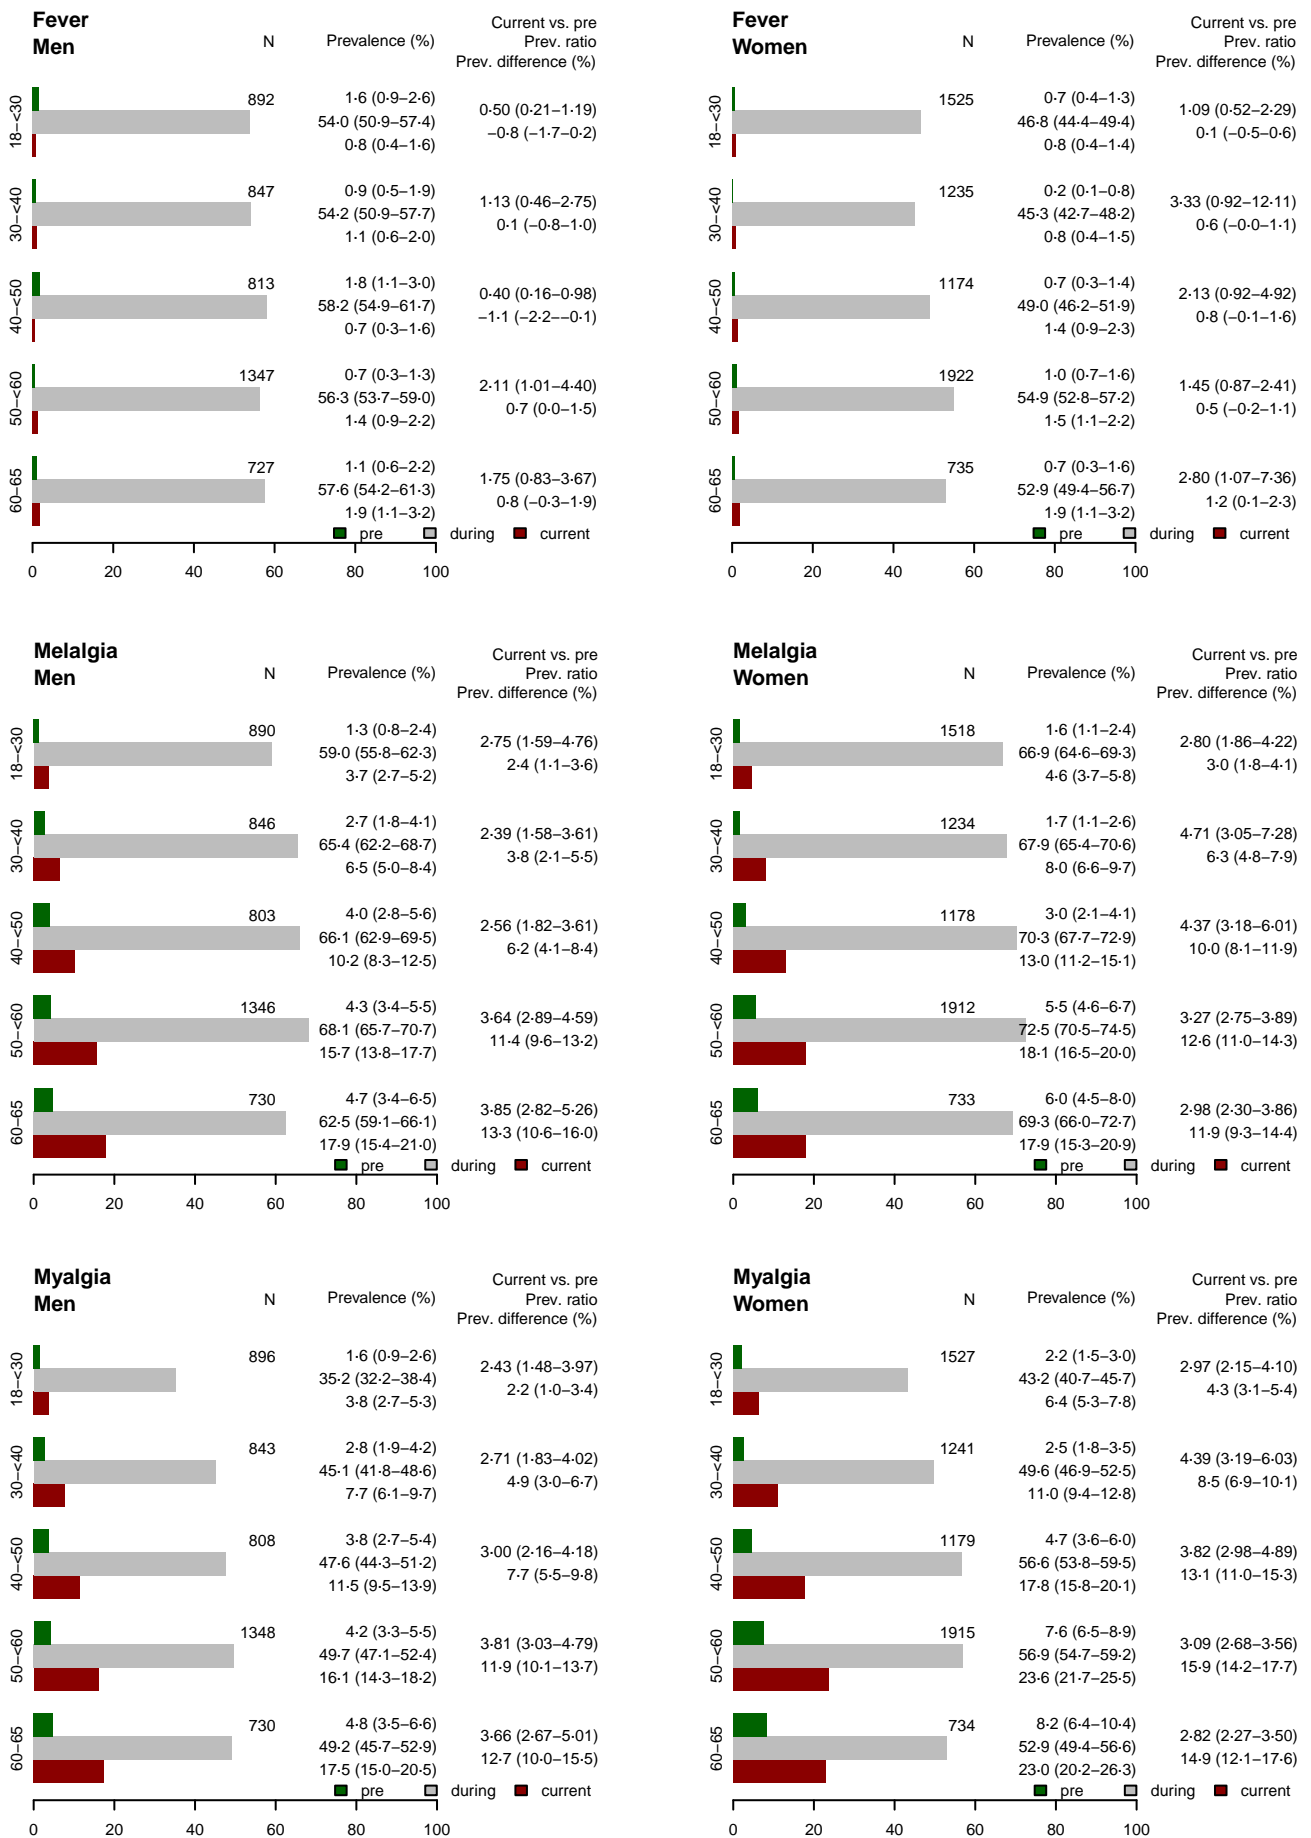

**Figure S2. Prevalence of symptoms before (pre), during, and 6-12 months after (current) after the SARS-CoV-2 infection, including prevalence ratio (current divided by pre) and prevalence difference (current minus pre) with 95 % confidence intervals according to age categories and sex. N represents the number of respondents in the respective age strata. (...continued)**

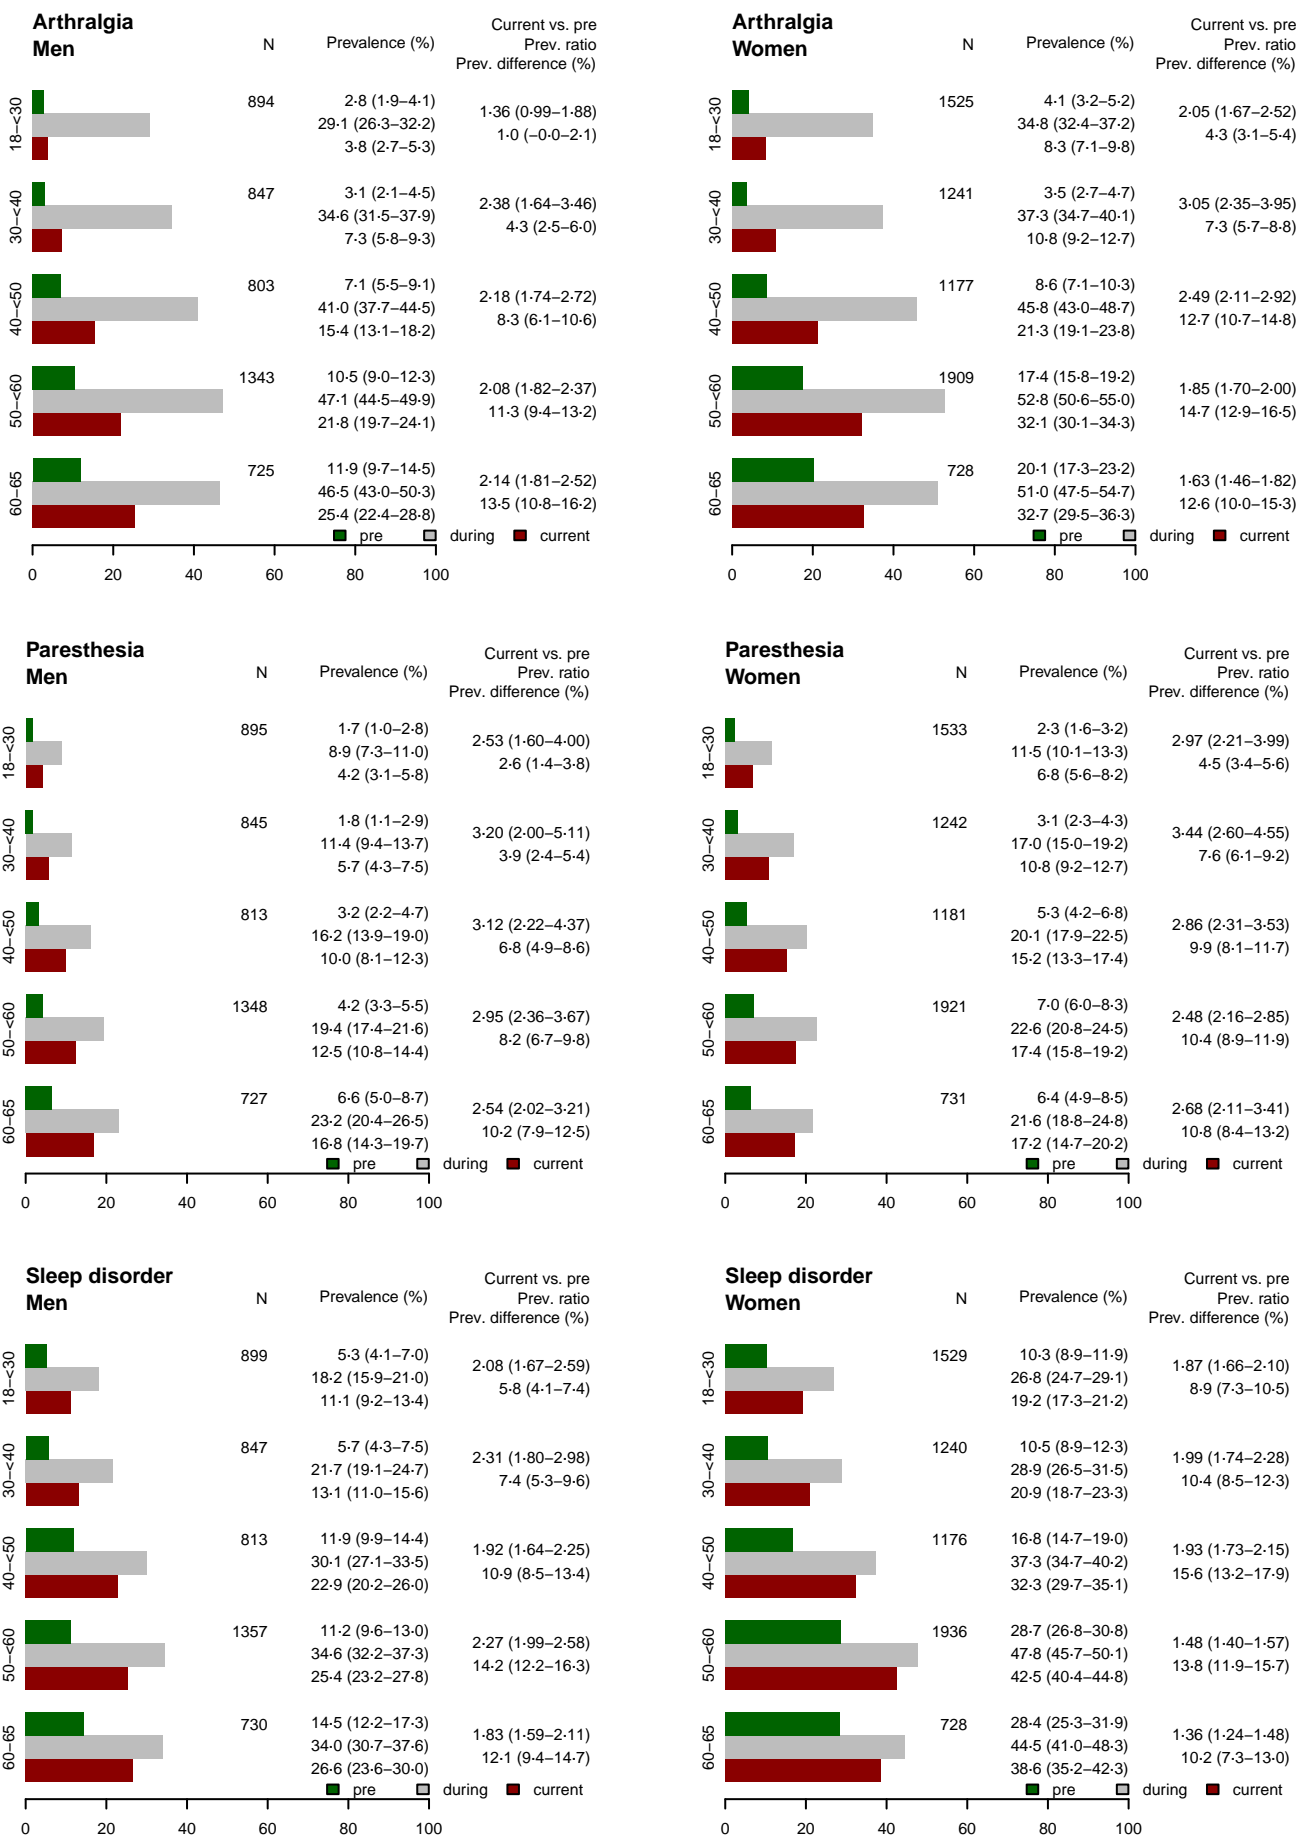

**Figure S2. Prevalence of symptoms before (pre), during, and 6-12 months after (current) after the SARS-CoV-2 infection, including prevalence ratio (current divided by pre) and prevalence difference (current minus pre) with 95 % confidence intervals according to age categories and sex. N represents the number of respondents in the respective age strata. (...continued)**

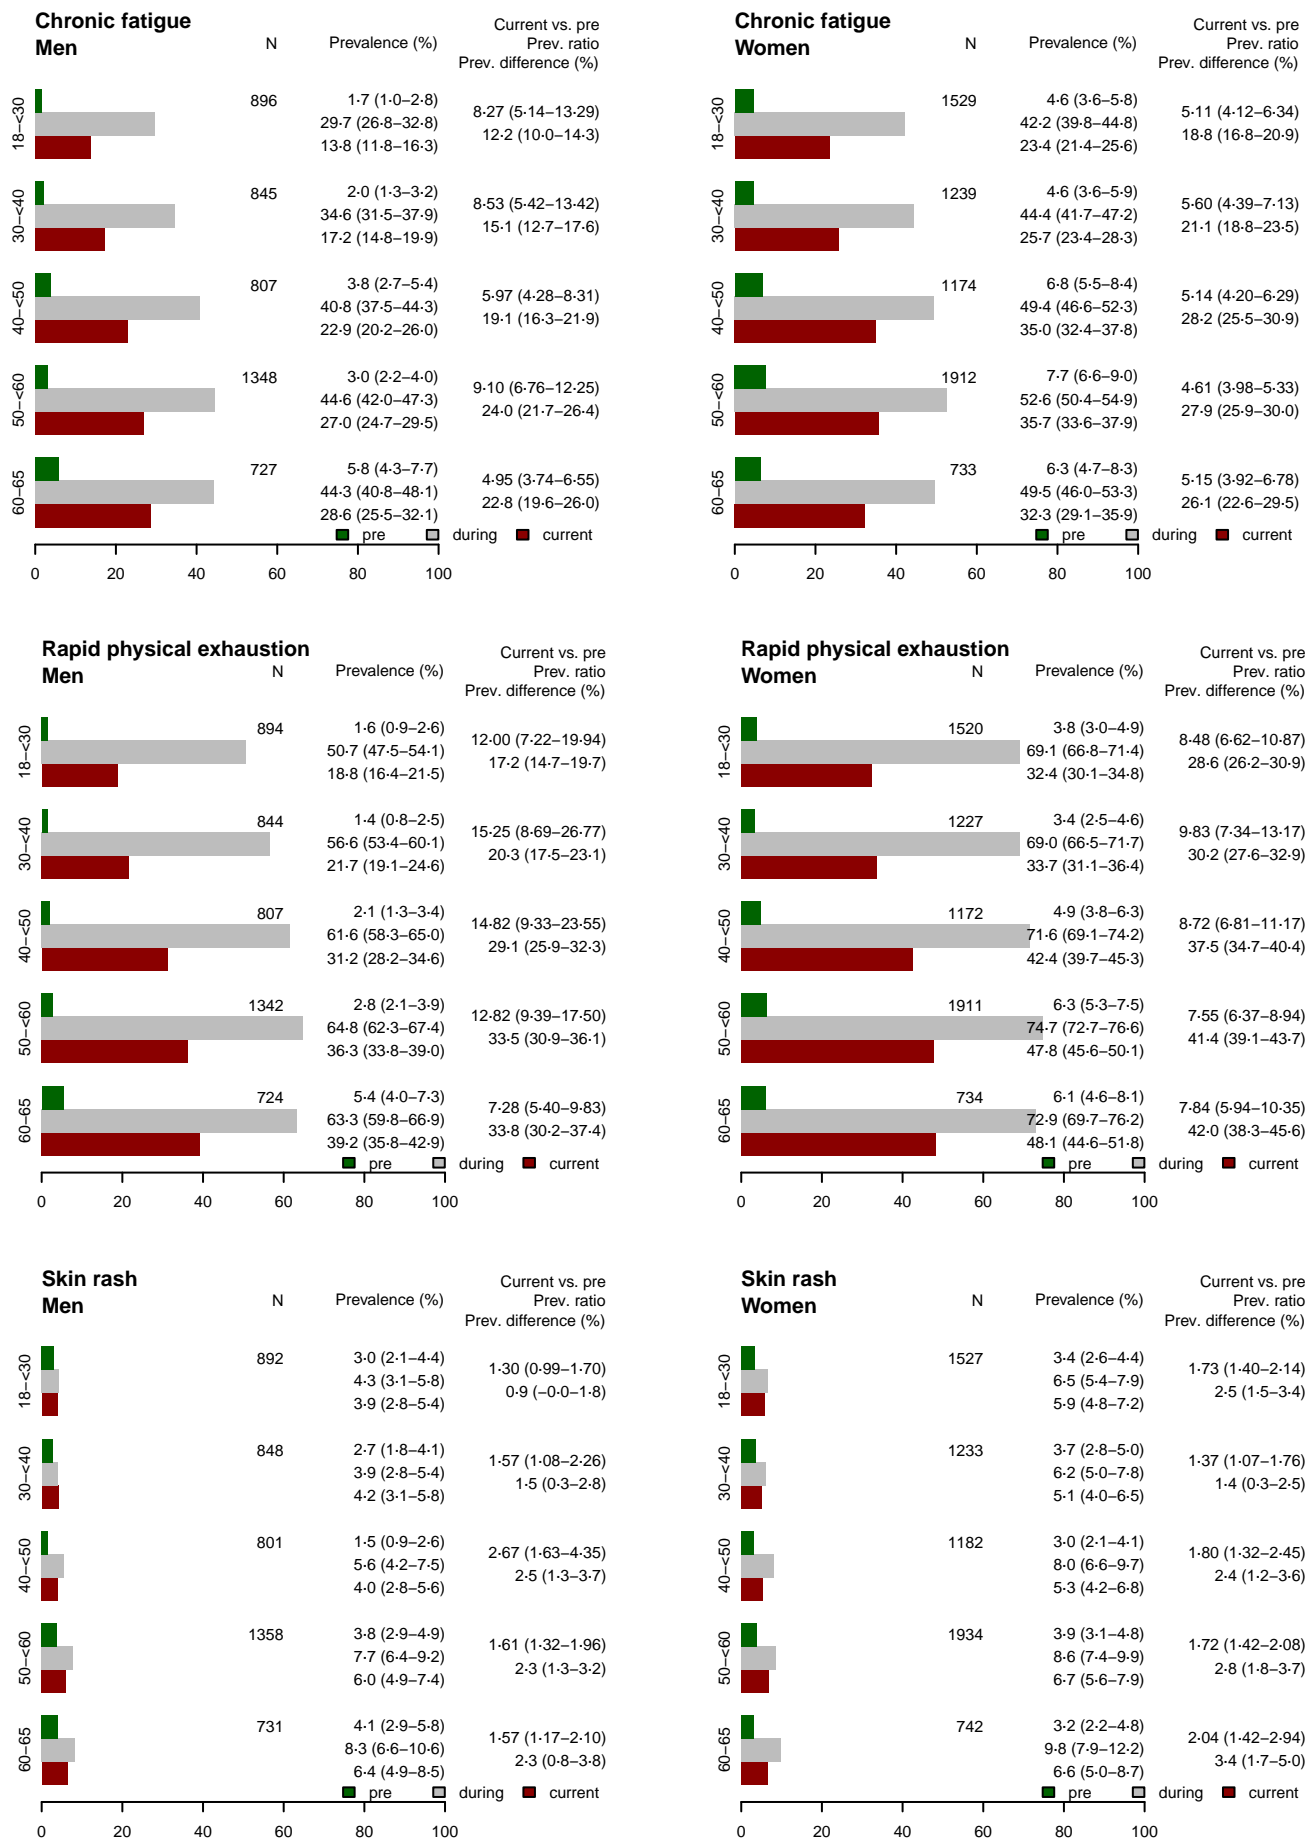

**Figure S2. Prevalence of symptoms before (pre), during, and 6-12 months after (current) after the SARS-CoV-2 infection, including prevalence ratio (current divided by pre) and prevalence difference (current minus pre) with 95 % confidence intervals according to age categories and sex. N represents the number of respondents in the respective age strata. (...continued)**

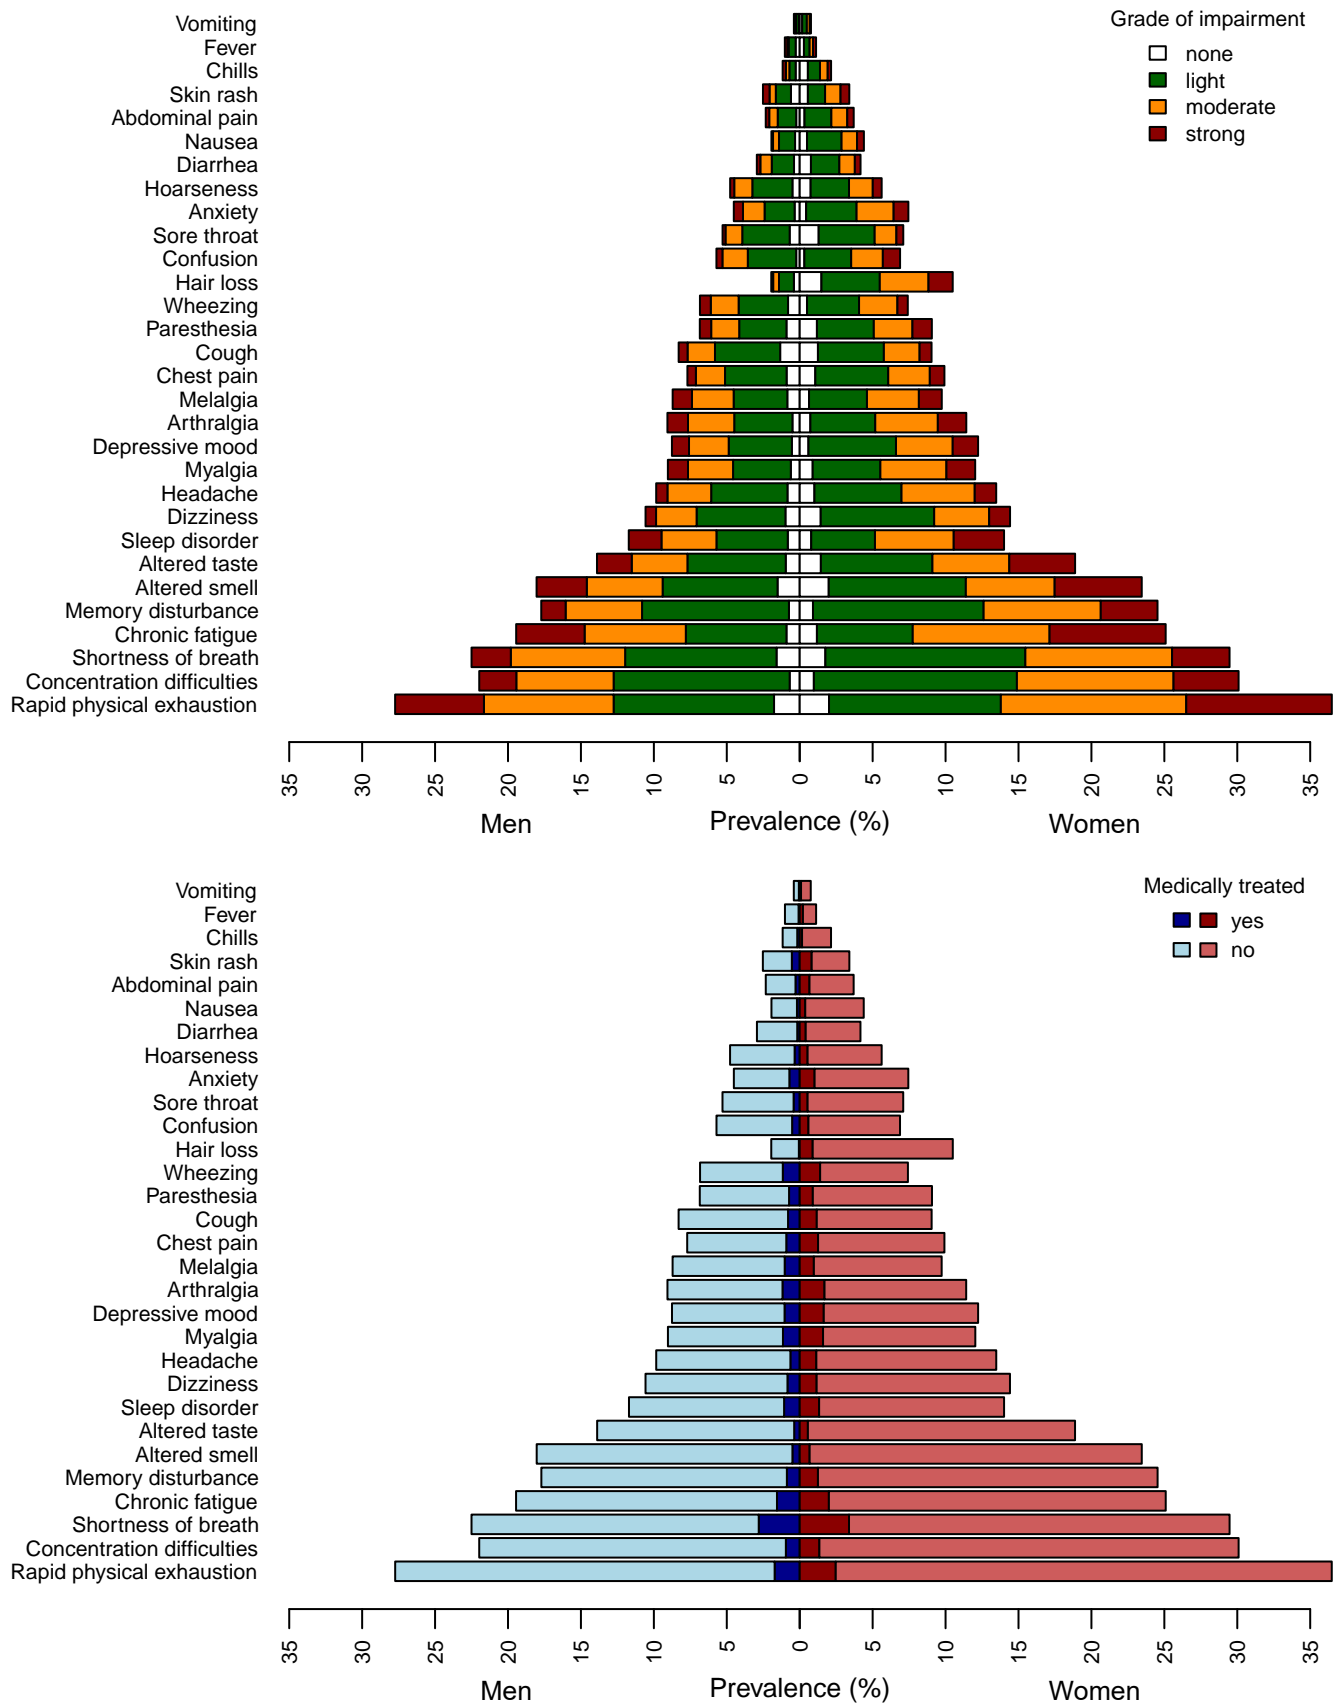

**Figure S3. Frequency of symptoms 6-12 months after acute infection, given the symptom was not present before the infection, stratified according to sex with grade of impairment (top panel) and medical treatment (bottom panel).**



**Table S1. Fatigue assessment scale (FAS) scores by new (not present before the infection) self-reported fatigue (as most prevalent symptom cluster)**

| Fatigue assessment scale (FAS)       | All<br>N=10 956 | No fatigue<br>N=6879 | Fatigue with grade of impairment |                    |                  |
|--------------------------------------|-----------------|----------------------|----------------------------------|--------------------|------------------|
|                                      |                 |                      | none/light<br>N=1554             | moderate<br>N=1443 | strong<br>N=1080 |
| Total score, mean (sd)               | 21.7 (8.9)      | 17.7 (6.5)           | 23.5 (6.4)                       | 28.7 (6.9)         | 35.5 (7.3)       |
| Physical sub-scale, mean (sd)        | 11.9 (4.9)      | 9.7 (3.7)            | 13.0 (3.4)                       | 15.9 (3.5)         | 19.3 (3.3)       |
| Mental sub-scale, mean (sd)          | 9.8 (4.5)       | 8.0 (3.3)            | 10.6 (3.6)                       | 12.7 (4.1)         | 16.1 (4.7)       |
| Proportion with FAS score >22, N (%) | 4570 (41.7)     | 1409 (20.5)          | 910 (58.6)                       | 1208 (83.7)        | 1043 (96.6)      |
| Proportion with FAS score >34, N (%) | 1228 (11.2)     | 211 (3.1)            | 95 (6.1)                         | 301 (20.9)         | 621 (57.5)       |

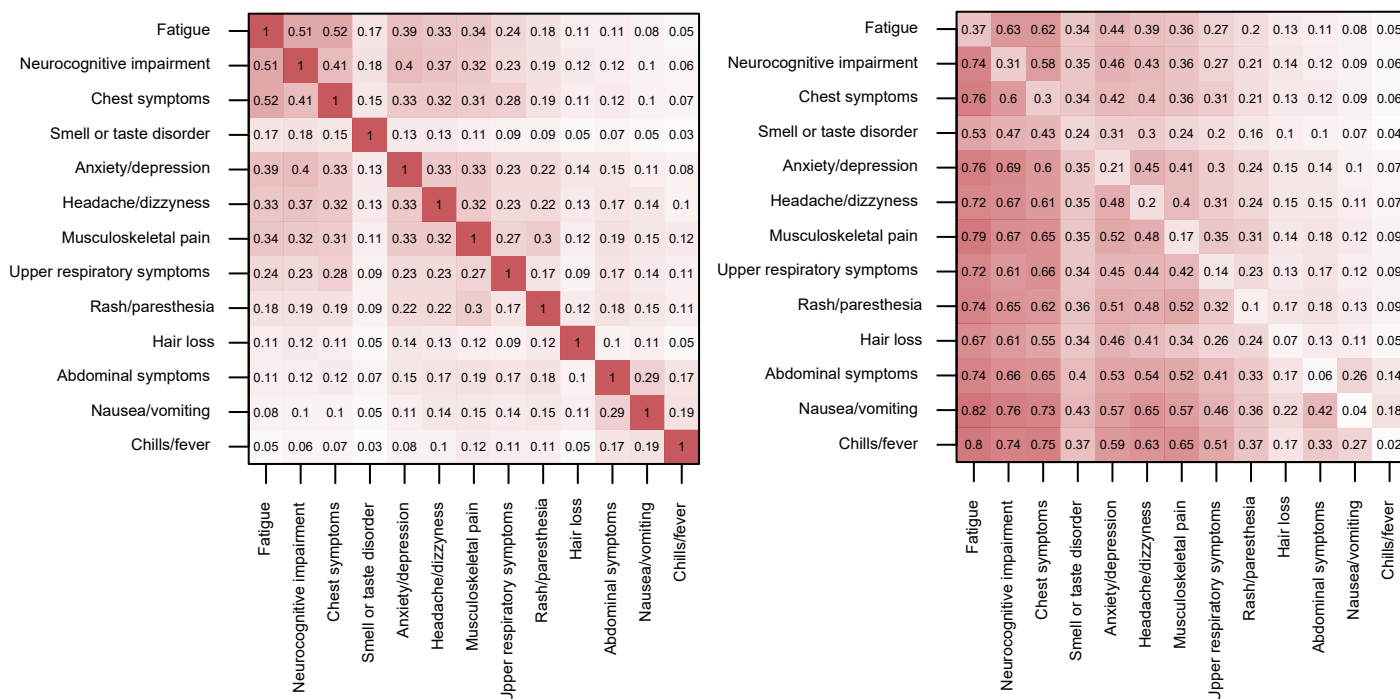

**Figure S5. Pairwise agreement (Cohen's kappa) between symptom clusters (left panel) and conditional probability (right panel) of experiencing symptoms of a specific cluster (columns) given another specific symptom cluster (rows). The overall prevalence of a specific symptom cluster is included in diagonal cells.**

**Table S2. Mutually adjusted prevalence ratios with 95% confidence intervals for new symptom clusters**

|                                         | Any                     | Fatigue                 | Neurocognitive impairment | Chest symptoms          | Smell or taste disorder | Anxiety/depression      | Headache/dizziness      |
|-----------------------------------------|-------------------------|-------------------------|---------------------------|-------------------------|-------------------------|-------------------------|-------------------------|
| Age, per 10 years                       | 1·00 (0·99-1·01)        | <b>1·04</b> (1·01-1·06) | <b>1·04</b> (1·01-1·06)   | 0·98 (0·96-1·00)        | <b>0·94</b> (0·92-0·97) | <b>1·05</b> (1·01-1·08) | 0·99 (0·96-1·02)        |
| Sex                                     |                         |                         |                           |                         |                         |                         |                         |
| Male (ref.)                             |                         |                         |                           |                         |                         |                         |                         |
| Female                                  | <b>1·20</b> (1·16-1·24) | <b>1·27</b> (1·21-1·34) | <b>1·32</b> (1·24-1·40)   | <b>1·27</b> (1·19-1·35) | <b>1·25</b> (1·16-1·35) | <b>1·32</b> (1·22-1·44) | <b>1·32</b> (1·21-1·44) |
| University entrance qualification       |                         |                         |                           |                         |                         |                         |                         |
| Yes (ref.)                              |                         |                         |                           |                         |                         |                         |                         |
| No                                      | 1·02 (0·99-1·06)        | 1·05 (1·00-1·11)        | 1·02 (0·96-1·08)          | <b>1·08</b> (1·02-1·15) | 1·03 (0·96-1·11)        | 1·03 (0·96-1·12)        | <b>1·11</b> (1·03-1·21) |
| Smoking status, N (%)                   |                         |                         |                           |                         |                         |                         |                         |
| Never (ref.)                            |                         |                         |                           |                         |                         |                         |                         |
| Former                                  | <b>1·07</b> (1·04-1·11) | <b>1·10</b> (1·04-1·17) | <b>1·18</b> (1·11-1·25)   | <b>1·14</b> (1·07-1·22) | 1·05 (0·97-1·14)        | <b>1·11</b> (1·02-1·21) | <b>1·14</b> (1·04-1·24) |
| Current                                 | <b>1·06</b> (1·01-1·11) | <b>1·17</b> (1·08-1·26) | <b>1·11</b> (1·01-1·22)   | <b>1·17</b> (1·06-1·28) | 1·03 (0·92-1·16)        | <b>1·22</b> (1·08-1·38) | <b>1·24</b> (1·09-1·40) |
| BMI, per 5 kg/m <sup>2</sup>            | <b>1·02</b> (1·01-1·03) | <b>1·05</b> (1·03-1·07) | <b>1·04</b> (1·02-1·07)   | <b>1·10</b> (1·07-1·13) | 1·00 (0·96-1·03)        | 1·02 (0·99-1·06)        | <b>1·04</b> (1·01-1·08) |
| Time since positive PCR, per month      | 1·00 (0·99-1·01)        | 1·00 (0·98-1·01)        | 1·01 (0·99-1·03)          | 1·00 (0·98-1·02)        | <b>1·04</b> (1·02-1·07) | 1·00 (0·98-1·03)        | 0·99 (0·97-1·02)        |
| Treatment of acute SARS-CoV-2 infection |                         |                         |                           |                         |                         |                         |                         |
| No medical care (ref.)                  |                         |                         |                           |                         |                         |                         |                         |
| Outpatient care                         | <b>1·36</b> (1·33-1·40) | <b>1·79</b> (1·70-1·88) | <b>1·87</b> (1·76-1·98)   | <b>1·83</b> (1·72-1·95) | <b>1·33</b> (1·22-1·44) | <b>2·05</b> (1·89-2·22) | <b>1·94</b> (1·78-2·11) |
| Inpatient care                          | <b>1·41</b> (1·34-1·48) | <b>1·89</b> (1·73-2·07) | <b>1·93</b> (1·74-2·14)   | <b>1·96</b> (1·75-2·18) | <b>1·23</b> (1·02-1·48) | <b>2·17</b> (1·87-2·52) | <b>2·10</b> (1·79-2·46) |
| Pre-existing conditions                 |                         |                         |                           |                         |                         |                         |                         |
| Musculoskeletal disorders               | <b>1·12</b> (1·09-1·16) | <b>1·17</b> (1·11-1·23) | <b>1·20</b> (1·13-1·27)   | <b>1·24</b> (1·16-1·32) | <b>1·22</b> (1·13-1·32) | <b>1·24</b> (1·14-1·34) | <b>1·29</b> (1·18-1·40) |
| Cardiovascular disorders                | <b>1·07</b> (1·03-1·11) | <b>1·11</b> (1·04-1·18) | 1·04 (0·97-1·12)          | <b>1·14</b> (1·06-1·23) | 1·04 (0·94-1·15)        | 1·05 (0·95-1·16)        | 1·02 (0·92-1·13)        |
| Neurological or sensory disorders       | <b>1·04</b> (1·01-1·08) | 1·05 (0·99-1·12)        | <b>1·12</b> (1·05-1·20)   | <b>1·13</b> (1·05-1·21) | 1·06 (0·97-1·16)        | 1·05 (0·95-1·15)        | 0·99 (0·89-1·09)        |
| Metabolic disorders                     | <b>1·05</b> (1·02-1·09) | <b>1·12</b> (1·05-1·19) | <b>1·12</b> (1·05-1·20)   | <b>1·09</b> (1·02-1·17) | 1·07 (0·98-1·18)        | 1·06 (0·96-1·16)        | <b>1·13</b> (1·03-1·25) |
| Mental disorders                        | <b>1·10</b> (1·06-1·14) | <b>1·16</b> (1·09-1·24) | <b>1·19</b> (1·11-1·28)   | <b>1·11</b> (1·02-1·19) | 1·08 (0·98-1·19)        | 0·91 (0·81-1·01)        | <b>1·17</b> (1·05-1·30) |
| Respiratory diseases                    | <b>1·06</b> (1·02-1·10) | <b>1·15</b> (1·08-1·22) | <b>1·12</b> (1·04-1·20)   | <b>1·09</b> (1·01-1·18) | 0·91 (0·82-1·01)        | 1·04 (0·94-1·15)        | 1·10 (0·99-1·22)        |
| Dermatological diseases                 | 1·03 (0·99-1·08)        | 1·01 (0·94-1·08)        | 1·04 (0·96-1·13)          | 1·03 (0·95-1·12)        | 1·07 (0·96-1·19)        | 1·10 (0·98-1·22)        | 0·92 (0·82-1·04)        |
| Cancer                                  | 1·02 (0·95-1·09)        | 0·97 (0·86-1·10)        | 1·03 (0·91-1·18)          | 0·99 (0·85-1·14)        | 1·08 (0·91-1·30)        | 0·87 (0·71-1·07)        | 0·95 (0·77-1·17)        |



**Table S2. Mutually adjusted prevalence ratios with 95% confidence intervals for new symptom clusters (...continued)**

|                                         | Musculoskeletal pain    | Upper respiratory symptoms | Rash/paresthesia        | Hair loss               | Abdominal symptoms      | Nausea/vomiting         | Chills/fever            |
|-----------------------------------------|-------------------------|----------------------------|-------------------------|-------------------------|-------------------------|-------------------------|-------------------------|
| Age, per 10 years                       | <b>1·20</b> (1·16-1·25) | <b>1·12</b> (1·07-1·16)    | <b>1·10</b> (1·04-1·15) | 0·97 (0·92-1·03)        | 1·02 (0·95-1·09)        | 1·01 (0·92-1·10)        | 1·07 (0·95-1·20)        |
| Sex                                     |                         |                            |                         |                         |                         |                         |                         |
| Male (ref.)                             |                         |                            |                         |                         |                         |                         |                         |
| Female                                  | <b>1·36</b> (1·24-1·49) | <b>1·14</b> (1·03-1·26)    | <b>1·36</b> (1·20-1·54) | <b>4·77</b> (3·86-5·90) | <b>1·35</b> (1·13-1·61) | <b>2·02</b> (1·57-2·60) | <b>1·51</b> (1·13-2·01) |
| University entrance qualification       |                         |                            |                         |                         |                         |                         |                         |
| Yes                                     |                         |                            |                         |                         |                         |                         |                         |
| No                                      | <b>1·13</b> (1·03-1·24) | <b>1·17</b> (1·06-1·30)    | <b>0·88</b> (0·78-0·99) | 1·12 (0·97-1·30)        | 1·17 (0·99-1·39)        | <b>1·27</b> (1·02-1·58) | 1·14 (0·86-1·51)        |
| Smoking status, N (%)                   |                         |                            |                         |                         |                         |                         |                         |
| Never (ref.)                            |                         |                            |                         |                         |                         |                         |                         |
| Former                                  | 1·07 (0·97-1·18)        | 0·93 (0·83-1·04)           | <b>1·20</b> (1·05-1·37) | 0·99 (0·84-1·17)        | 1·03 (0·86-1·24)        | <b>1·37</b> (1·09-1·73) | 1·25 (0·93-1·66)        |
| Current                                 | <b>1·37</b> (1·20-1·56) | <b>1·28</b> (1·11-1·49)    | <b>1·41</b> (1·17-1·70) | 1·02 (0·81-1·30)        | 1·08 (0·83-1·42)        | <b>1·60</b> (1·18-2·17) | <b>1·72</b> (1·17-2·51) |
| BMI, per 5 kg/m <sup>2</sup>            | <b>1·08</b> (1·04-1·12) | <b>1·09</b> (1·04-1·14)    | <b>1·08</b> (1·02-1·14) | <b>1·07</b> (1·01-1·13) | 0·98 (0·90-1·07)        | 0·94 (0·84-1·05)        | 1·01 (0·89-1·14)        |
| Time since positive PCR, per month      | 0·99 (0·97-1·02)        | 0·98 (0·95-1·01)           | 1·01 (0·98-1·05)        | <b>0·88</b> (0·84-0·92) | 0·98 (0·93-1·03)        | 0·96 (0·90-1·02)        | 0·96 (0·88-1·03)        |
| Treatment of acute SARS-CoV-2 infection |                         |                            |                         |                         |                         |                         |                         |
| No medical care (ref.)                  |                         |                            |                         |                         |                         |                         |                         |
| Outpatient care                         | <b>2·16</b> (1·97-2·37) | <b>2·07</b> (1·86-2·29)    | <b>2·08</b> (1·82-2·37) | <b>2·24</b> (1·93-2·61) | <b>2·41</b> (2·02-2·88) | <b>2·33</b> (1·85-2·92) | <b>3·08</b> (2·33-4·06) |
| Inpatient care                          | <b>2·17</b> (1·83-2·56) | <b>1·79</b> (1·46-2·20)    | <b>3·03</b> (2·45-3·74) | <b>4·06</b> (3·22-5·11) | <b>2·74</b> (1·98-3·78) | <b>2·70</b> (1·76-4·14) | <b>3·42</b> (2·10-5·57) |
| Pre-existing conditions                 |                         |                            |                         |                         |                         |                         |                         |
| Musculoskeletal disorders               | <b>1·21</b> (1·10-1·32) | <b>1·29</b> (1·16-1·43)    | 1·13 (0·99-1·29)        | 1·07 (0·91-1·25)        | <b>1·22</b> (1·02-1·46) | 1·23 (0·98-1·55)        | 1·07 (0·81-1·41)        |
| Cardiovascular disorders                | <b>1·13</b> (1·02-1·25) | <b>1·15</b> (1·02-1·29)    | 1·02 (0·87-1·19)        | 1·17 (0·97-1·41)        | 1·22 (1·00-1·49)        | 1·01 (0·77-1·33)        | 1·08 (0·79-1·49)        |
| Neurological or sensory disorders       | 1·10 (0·99-1·22)        | <b>1·14</b> (1·01-1·28)    | <b>1·25</b> (1·08-1·44) | 1·02 (0·85-1·23)        | 1·03 (0·84-1·27)        | 1·15 (0·89-1·47)        | 0·88 (0·63-1·23)        |
| Metabolic disorders                     | 1·09 (0·98-1·21)        | 1·07 (0·95-1·21)           | <b>1·17</b> (1·01-1·35) | <b>1·19</b> (1·01-1·41) | 1·19 (0·97-1·45)        | 1·27 (0·99-1·62)        | 1·08 (0·79-1·47)        |
| Mental disorders                        | <b>1·18</b> (1·06-1·32) | 1·11 (0·97-1·26)           | <b>1·18</b> (1·01-1·38) | 1·09 (0·90-1·32)        | <b>1·31</b> (1·06-1·62) | <b>1·70</b> (1·33-2·18) | 1·21 (0·84-1·72)        |
| Respiratory diseases                    | 1·05 (0·94-1·18)        | <b>1·17</b> (1·03-1·33)    | 1·16 (0·99-1·36)        | 0·94 (0·76-1·14)        | 0·99 (0·79-1·24)        | 1·07 (0·81-1·42)        | 1·18 (0·83-1·66)        |
| Dermatological diseases                 | 0·97 (0·85-1·11)        | 1·06 (0·92-1·22)           | 1·17 (0·99-1·37)        | 1·10 (0·90-1·35)        | 0·89 (0·69-1·15)        | 0·95 (0·70-1·29)        | 1·17 (0·81-1·68)        |
| Cancer                                  | 1·13 (0·94-1·37)        | 1·08 (0·86-1·34)           | 0·81 (0·59-1·12)        | 0·88 (0·62-1·27)        | 1·10 (0·75-1·61)        | 1·05 (0·65-1·71)        | 1·27 (0·71-2·25)        |

**Table S3. Mutually adjusted prevalence ratios with 95% confidence intervals for new symptom clusters with grade of impairment moderate to strong**

|                                         | Any                     | Fatigue                 | Neurocognitive impairment | Chest symptoms          | Smell or taste disorder | Anxiety/depression      | Headache/dizziness      |
|-----------------------------------------|-------------------------|-------------------------|---------------------------|-------------------------|-------------------------|-------------------------|-------------------------|
| Age, per 10 years                       | 1.00 (0.98-1.02)        | <b>1.06</b> (1.02-1.09) | <b>1.05</b> (1.01-1.09)   | 0.99 (0.95-1.04)        | 0.96 (0.92-1.00)        | 1.03 (0.99-1.08)        | 0.99 (0.94-1.05)        |
| Sex                                     |                         |                         |                           |                         |                         |                         |                         |
| Male (ref.)                             |                         |                         |                           |                         |                         |                         |                         |
| Female                                  | <b>1.37</b> (1.30-1.44) | <b>1.46</b> (1.35-1.58) | <b>1.52</b> (1.37-1.68)   | <b>1.33</b> (1.20-1.48) | <b>1.36</b> (1.21-1.53) | <b>1.47</b> (1.30-1.66) | <b>1.49</b> (1.29-1.72) |
| University entrance qualification       |                         |                         |                           |                         |                         |                         |                         |
| Yes (ref.)                              |                         |                         |                           |                         |                         |                         |                         |
| No                                      | <b>1.14</b> (1.09-1.20) | <b>1.19</b> (1.10-1.28) | <b>1.09</b> (0.99-1.20)   | <b>1.25</b> (1.13-1.39) | <b>1.10</b> (0.99-1.23) | <b>1.15</b> (1.02-1.29) | <b>1.37</b> (1.19-1.57) |
| Smoking status, N (%)                   |                         |                         |                           |                         |                         |                         |                         |
| Never (ref.)                            |                         |                         |                           |                         |                         |                         |                         |
| Former                                  | <b>1.12</b> (1.06-1.17) | <b>1.12</b> (1.03-1.21) | <b>1.25</b> (1.13-1.38)   | <b>1.18</b> (1.06-1.31) | 1.07 (0.94-1.21)        | <b>1.24</b> (1.09-1.40) | 1.13 (0.97-1.31)        |
| Current                                 | <b>1.22</b> (1.14-1.31) | <b>1.37</b> (1.24-1.53) | <b>1.26</b> (1.09-1.46)   | <b>1.27</b> (1.09-1.48) | <b>1.30</b> (1.11-1.54) | <b>1.49</b> (1.26-1.75) | <b>1.34</b> (1.10-1.64) |
| BMI, per 5 kg/m <sup>2</sup>            | <b>1.05</b> (1.03-1.07) | <b>1.09</b> (1.05-1.12) | <b>1.06</b> (1.02-1.11)   | <b>1.16</b> (1.11-1.20) | <b>1.08</b> (1.02-1.13) | 1.04 (0.99-1.10)        | 1.04 (0.97-1.10)        |
| Time since positive PCR, per month      | 1.00 (0.98-1.01)        | 0.98 (0.96-1.01)        | 1.01 (0.98-1.03)          | 1.01 (0.98-1.04)        | <b>1.03</b> (1.00-1.07) | 1.00 (0.96-1.03)        | 0.97 (0.94-1.02)        |
| Treatment of acute SARS-CoV-2 infection |                         |                         |                           |                         |                         |                         |                         |
| No medical care (ref.)                  |                         |                         |                           |                         |                         |                         |                         |
| Outpatient care                         | <b>1.69</b> (1.62-1.77) | <b>2.12</b> (1.97-2.28) | <b>2.27</b> (2.05-2.50)   | <b>2.43</b> (2.19-2.69) | <b>1.48</b> (1.31-1.68) | <b>2.50</b> (2.23-2.80) | <b>2.79</b> (2.42-3.21) |
| Inpatient care                          | <b>1.82</b> (1.68-1.97) | <b>2.18</b> (1.91-2.50) | <b>2.64</b> (2.24-3.11)   | <b>2.52</b> (2.10-3.02) | <b>1.29</b> (0.98-1.71) | <b>2.57</b> (2.06-3.20) | <b>3.16</b> (2.46-4.05) |
| Pre-existing conditions                 |                         |                         |                           |                         |                         |                         |                         |
| Musculoskeletal disorders               | <b>1.19</b> (1.14-1.25) | <b>1.23</b> (1.14-1.33) | <b>1.30</b> (1.18-1.43)   | <b>1.32</b> (1.19-1.46) | <b>1.24</b> (1.10-1.40) | <b>1.18</b> (1.04-1.33) | <b>1.34</b> (1.17-1.55) |
| Cardiovascular disorders                | <b>1.11</b> (1.05-1.17) | <b>1.12</b> (1.03-1.22) | 0.99 (0.88-1.11)          | <b>1.12</b> (1.00-1.27) | 0.97 (0.83-1.12)        | 1.02 (0.88-1.18)        | 0.92 (0.77-1.10)        |
| Respiratory diseases                    | <b>1.11</b> (1.05-1.18) | <b>1.20</b> (1.10-1.31) | <b>1.16</b> (1.03-1.30)   | <b>1.19</b> (1.05-1.35) | 0.93 (0.79-1.09)        | 1.03 (0.89-1.20)        | 1.01 (0.84-1.21)        |
| Mental disorders                        | <b>1.20</b> (1.14-1.27) | <b>1.26</b> (1.16-1.37) | <b>1.46</b> (1.31-1.63)   | <b>1.17</b> (1.03-1.32) | 1.07 (0.92-1.24)        | 1.04 (0.89-1.21)        | <b>1.38</b> (1.17-1.62) |
| Neurological or sensory disorders       | <b>1.09</b> (1.03-1.15) | <b>1.15</b> (1.06-1.25) | 1.11 (0.99-1.23)          | <b>1.25</b> (1.12-1.40) | 1.11 (0.97-1.28)        | 1.05 (0.91-1.20)        | 0.97 (0.82-1.15)        |
| Dermatological diseases                 | 1.05 (0.99-1.12)        | 1.04 (0.94-1.15)        | 0.97 (0.85-1.11)          | 1.02 (0.89-1.17)        | 1.08 (0.92-1.27)        | 0.93 (0.79-1.11)        | 0.81 (0.66-1.00)        |
| Cancer                                  | 0.99 (0.88-1.10)        | 0.88 (0.73-1.05)        | 1.01 (0.82-1.25)          | 0.97 (0.77-1.24)        | 1.00 (0.75-1.33)        | 0.94 (0.71-1.24)        | 0.87 (0.61-1.24)        |
| Metabolic disorders                     | 1.04 (0.98-1.10)        | <b>1.09</b> (1.00-1.19) | 1.15 (1.03-1.28)          | 1.09 (0.97-1.23)        | 1.04 (0.90-1.19)        | 1.07 (0.94-1.23)        | 1.03 (0.87-1.21)        |

**Table S3. Mutually adjusted prevalence ratios with 95% confidence intervals for new symptom clusters with grade of impairment moderate to strong (...continued)**

|                                         | Musculoskeletal pain    | Upper respiratory symptoms | Rash/paresthesia        | Hair loss               | Abdominal symptoms      | Nausea/vomiting         | Chills/fever            |
|-----------------------------------------|-------------------------|----------------------------|-------------------------|-------------------------|-------------------------|-------------------------|-------------------------|
| Age, per 10 years                       | <b>1·30</b> (1·23-1·38) | <b>1·13</b> (1·04-1·22)    | <b>1·12</b> (1·04-1·22) | 0·98 (0·89-1·07)        | 1·05 (0·93-1·18)        | 0·99 (0·85-1·16)        | 1·07 (0·88-1·31)        |
| Sex                                     |                         |                            |                         |                         |                         |                         |                         |
| Male (ref.)                             |                         |                            |                         |                         |                         |                         |                         |
| Female                                  | <b>1·55</b> (1·34-1·78) | <b>1·20</b> (1·00-1·45)    | <b>1·70</b> (1·38-2·10) | <b>8·32</b> (5·61-12·3) | <b>1·54</b> (1·14-2·08) | <b>2·46</b> (1·55-3·89) | 1·67 (0·97-2·85)        |
| University entrance qualification       |                         |                            |                         |                         |                         |                         |                         |
| Yes (ref.)                              |                         |                            |                         |                         |                         |                         |                         |
| No                                      | <b>1·21</b> (1·06-1·39) | <b>1·26</b> (1·04-1·52)    | 1·04 (0·85-1·26)        | <b>1·33</b> (1·06-1·68) | 1·15 (0·87-1·52)        | 1·13 (0·77-1·66)        | 1·14 (0·69-1·91)        |
| Smoking status, N (%)                   |                         |                            |                         |                         |                         |                         |                         |
| Never (ref.)                            |                         |                            |                         |                         |                         |                         |                         |
| Former                                  | 1·13 (0·98-1·30)        | 1·07 (0·88-1·30)           | <b>1·27</b> (1·03-1·57) | 0·98 (0·76-1·26)        | 1·07 (0·79-1·46)        | <b>1·52</b> (1·02-2·27) | 1·25 (0·75-2·10)        |
| Current                                 | <b>1·44</b> (1·18-1·75) | <b>1·57</b> (1·21-2·04)    | <b>1·69</b> (1·28-2·24) | 1·24 (0·89-1·74)        | <b>1·53</b> (1·03-2·27) | <b>2·14</b> (1·32-3·48) | <b>1·95</b> (1·02-3·73) |
| BMI, per 5 kg/m <sup>2</sup>            | <b>1·11</b> (1·05-1·17) | <b>1·11</b> (1·02-1·20)    | 1·08 (0·99-1·17)        | 1·04 (0·95-1·13)        | 0·95 (0·81-1·11)        | 0·80 (0·64-1·00)        | 0·90 (0·70-1·17)        |
| Time since positive PCR, per month      | 1·00 (0·96-1·04)        | 0·95 (0·90-1·01)           | 0·96 (0·91-1·02)        | 0·87 (0·81-0·92)        | 1·01 (0·93-1·09)        | 0·92 (0·83-1·02)        | 1·03 (0·89-1·19)        |
| Treatment of acute SARS-CoV-2 infection |                         |                            |                         |                         |                         |                         |                         |
| No medical care (ref.)                  |                         |                            |                         |                         |                         |                         |                         |
| Outpatient care                         | <b>2·61</b> (2·27-2·99) | <b>2·70</b> (2·23-3·27)    | <b>2·55</b> (2·07-3·14) | <b>2·44</b> (1·93-3·09) | <b>2·98</b> (2·22-3·99) | <b>2·65</b> (1·79-3·92) | <b>3·64</b> (2·21-5·98) |
| Inpatient care                          | <b>2·58</b> (2·03-3·30) | <b>2·55</b> (1·81-3·58)    | <b>4·59</b> (3·38-6·23) | <b>5·60</b> (4·01-7·82) | <b>3·90</b> (2·34-6·50) | 2·21 (0·95-5·18)        | <b>5·85</b> (2·75-12·4) |
| Pre-existing conditions                 |                         |                            |                         |                         |                         |                         |                         |
| Musculoskeletal disorders               | <b>1·21</b> (1·06-1·39) | <b>1·33</b> (1·10-1·61)    | 1·10 (0·89-1·35)        | 1·08 (0·84-1·37)        | 1·14 (0·86-1·53)        | 1·40 (0·95-2·05)        | 1·28 (0·80-2·07)        |
| Cardiovascular disorders                | <b>1·18</b> (1·01-1·37) | 1·14 (0·92-1·42)           | <b>1·32</b> (1·04-1·67) | 1·32 (1·00-1·75)        | 1·24 (0·88-1·74)        | 1·41 (0·86-2·32)        | 1·13 (0·66-1·93)        |
| Respiratory diseases                    | 1·06 (0·90-1·26)        | <b>1·60</b> (1·29-1·98)    | <b>1·50</b> (1·20-1·88) | 1·02 (0·75-1·37)        | 0·97 (0·66-1·42)        | 1·05 (0·65-1·70)        | 0·98 (0·52-1·86)        |
| Mental disorders                        | <b>1·29</b> (1·10-1·51) | 1·14 (0·91-1·43)           | 0·94 (0·73-1·21)        | 1·02 (0·77-1·36)        | <b>1·60</b> (1·14-2·24) | <b>1·89</b> (1·24-2·89) | 1·07 (0·57-2·00)        |
| Neurological or sensory disorders       | 1·12 (0·96-1·30)        | 1·11 (0·90-1·37)           | 1·21 (0·97-1·53)        | 0·98 (0·75-1·30)        | 0·93 (0·66-1·31)        | 1·30 (0·85-1·99)        | 0·77 (0·42-1·42)        |
| Dermatological diseases                 | 0·91 (0·75-1·11)        | 0·93 (0·72-1·22)           | 1·07 (0·81-1·41)        | 1·20 (0·88-1·62)        | 0·59 (0·36-0·97)        | 0·44 (0·21-0·92)        | 0·69 (0·32-1·48)        |
| Cancer                                  | 0·99 (0·74-1·34)        | 1·24 (0·85-1·82)           | 0·82 (0·50-1·33)        | 0·82 (0·47-1·43)        | 1·50 (0·85-2·64)        | 1·47 (0·69-3·12)        | 1·49 (0·60-3·69)        |
| Metabolic disorders                     | 1·03 (0·88-1·20)        | 0·98 (0·79-1·22)           | 1·10 (0·87-1·38)        | <b>1·32</b> (1·03-1·70) | 1·16 (0·82-1·63)        | 0·99 (0·62-1·59)        | 1·25 (0·73-2·14)        |

|                                    | 18-<30 years | 30-<40 years | 40-<50 years | 50-<60 years | 60-65 years |
|------------------------------------|--------------|--------------|--------------|--------------|-------------|
| Average total loss - men           | 6.7          | 7.9          | 10.7         | 11.8         | 13.6        |
| Average total loss - women         | 9.4          | 10.5         | 13.4         | 14.3         | 14.8        |
| Unattributed - men                 | 1.27         | 1.55         | 2.06         | 2.90         | 3.10        |
| Unattributed - women               | 1.89         | 1.43         | 1.54         | 2.05         | 2.50        |
| Fatigue - men                      | 1.51         | 1.78         | 2.84         | 2.65         | 2.99        |
| Fatigue - women                    | 1.58         | 2.58         | 2.80         | 1.93         | 2.19        |
| Neurocognitive impairment - men    | 0.79         | 0.60         | 1.54         | 1.36         | 1.58        |
| Neurocognitive impairment - women  | 0.83         | 0.90         | 1.91         | 1.91         | 2.98        |
| Chest symptoms - men               | 0.88         | 0.83         | 0.91         | 1.73         | 2.71        |
| Chest symptoms - women             | 1.80         | 1.44         | 1.79         | 2.23         | 2.00        |
| Smell or taste disorder - men      | 1.01         | 1.06         | 0.92         | 0.52         | 0.63        |
| Smell or taste disorder - women    | 1.18         | 1.26         | 1.23         | 1.29         | 0.55        |
| Anxiety/Depression - men           | 0.01         | 0.54         | 0.51         | 0.79         | 0.77        |
| Anxiety/Depression - women         | 0.68         | 0.25         | 1.05         | 0.78         | 0.94        |
| Headache/dizziness - men           | 0.51         | 0.46         | 0.59         | 0.66         | 0.41        |
| Headache/dizziness - women         | 0.53         | 0.54         | 0.51         | 0.66         | 0.91        |
| Musculoskeletal pain - men         | 0.05         | 0.21         | -0.11        | 0.53         | 0.40        |
| Musculoskeletal pain - women       | 0.37         | 0.67         | 0.80         | 0.80         | 0.53        |
| Upper respiratory symptoms - men   | 0.19         | 0.29         | 0.26         | 0.33         | -0.02       |
| Upper respiratory symptoms - women | 0.07         | 0.14         | 0.14         | 0.74         | 0.57        |
| Rash/paresthesia - men             | 0.13         | 0.24         | 0.47         | 0.04         | 0.32        |
| Rash/paresthesia - women           | 0.07         | 0.31         | 0.63         | 0.22         | 0.47        |
| Hair loss - men                    | 0.01         | -0.02        | -0.01        | -0.00        | 0.17        |
| Hair loss - women                  | -0.03        | 0.48         | 0.08         | 0.13         | 0.37        |
| Abdominal symptoms - men           | -0.04        | 0.11         | 0.15         | 0.20         | -0.04       |
| Abdominal symptoms - women         | 0.02         | 0.09         | 0.04         | 0.09         | -0.09       |
| Nausea/vomiting - men              | 0.22         | 0.03         | 0.08         | 0.06         | 0.34        |
| Nausea/vomiting - women            | 0.21         | 0.07         | 0.32         | 0.24         | 0.09        |
| Chills/fever - men                 | -0.01        | 0.10         | 0.15         | -0.10        | -0.09       |
| Chills/fever - women               | 0.17         | 0.14         | 0.17         | 0.21         | 0.24        |

  

|                                    | 18-<30 years | 30-<40 years | 40-<50 years | 50-<60 years | 60-65 years |
|------------------------------------|--------------|--------------|--------------|--------------|-------------|
| Average total loss - men           | 5.5          | 6.5          | 9.2          | 11.6         | 14.9        |
| Average total loss - women         | 7.5          | 9.0          | 12.5         | 14.0         | 15.3        |
| Unattributed - men                 | 1.02         | 0.61         | 1.25         | 2.47         | 4.13        |
| Unattributed - women               | 0.91         | 0.68         | 0.51         | 2.05         | 2.57        |
| Fatigue - men                      | 1.09         | 1.92         | 3.19         | 2.98         | 3.23        |
| Fatigue - women                    | 1.52         | 2.55         | 2.70         | 1.92         | 2.41        |
| Neurocognitive impairment - men    | 1.16         | 0.88         | 1.51         | 1.56         | 1.73        |
| Neurocognitive impairment - women  | 1.42         | 1.67         | 2.78         | 2.39         | 2.69        |
| Chest symptoms - men               | 0.37         | 0.62         | 0.21         | 1.20         | 2.12        |
| Chest symptoms - women             | 0.52         | 0.68         | 1.17         | 1.37         | 1.75        |
| Smell or taste disorder - men      | 0.23         | 0.38         | 0.29         | 0.15         | 0.42        |
| Smell or taste disorder - women    | 0.04         | 0.39         | 0.47         | 0.97         | 0.24        |
| Anxiety/Depression - men           | 0.16         | 0.45         | 0.83         | 0.83         | 0.45        |
| Anxiety/Depression - women         | 1.36         | 0.53         | 1.06         | 0.63         | 1.33        |
| Headache/dizziness - men           | 0.73         | 0.97         | 0.53         | 0.46         | 0.61        |
| Headache/dizziness - women         | 0.41         | 0.59         | 0.61         | 0.83         | 0.82        |
| Musculoskeletal pain - men         | 0.07         | 0.06         | -0.02        | 0.90         | 0.79        |
| Musculoskeletal pain - women       | 0.37         | 0.45         | 1.14         | 0.72         | 0.47        |
| Upper respiratory symptoms - men   | 0.14         | -0.15        | 0.29         | 0.21         | -0.21       |
| Upper respiratory symptoms - women | 0.15         | 0.17         | 0.14         | 1.00         | 0.38        |
| Rash/paresthesia - men             | 0.09         | 0.33         | 0.43         | 0.11         | 0.89        |
| Rash/paresthesia - women           | 0.14         | 0.38         | 1.02         | 0.32         | 0.64        |
| Hair loss - men                    | 0.02         | -0.05        | -0.03        | -0.00        | 0.07        |
| Hair loss - women                  | -0.01        | 0.57         | 0.19         | 0.42         | 0.53        |
| Abdominal symptoms - men           | 0.01         | 0.03         | 0.13         | 0.14         | -0.28       |
| Abdominal symptoms - women         | 0.21         | 0.07         | 0.12         | 0.30         | 0.01        |
| Nausea/vomiting - men              | 0.24         | 0.09         | 0.06         | 0.25         | 0.45        |
| Nausea/vomiting - women            | 0.21         | 0.13         | 0.17         | 0.28         | 0.15        |
| Chills/fever - men                 | 0.05         | 0.14         | 0.14         | -0.10        | 0.07        |
| Chills/fever - women               | 0.14         | 0.04         | 0.23         | 0.40         | 0.35        |

**Figure S6. Attributable percentage loss of general health (left panel) and working capacity (right panel), stratified by age categories and sex.**

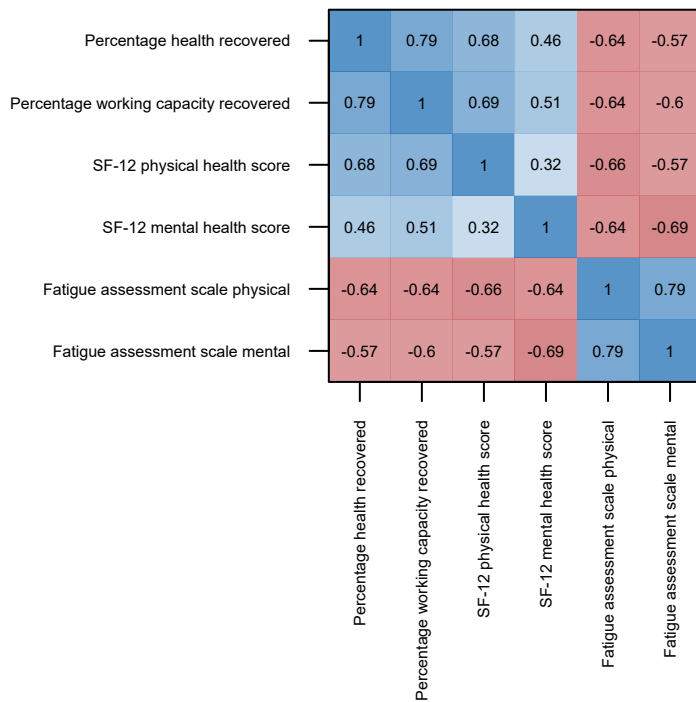

**Figure S7. Pairwise Pearson's correlation coefficient between measures of recovered general health, working capacity, physical and mental health score (SF-12), and fatigue assessment.**

**Table S8. Participation according to age and sex.**

| Sex    | Source population* | Participants (%) |
|--------|--------------------|------------------|
| Male   | 24 959             | 4829 (19.3)      |
| Female | 25 483             | 6881 (27.0)      |
| Total  | 50 442             | 11 710 (23.2)    |

  

| Age class (years) | Source population | Participants (%) |
|-------------------|-------------------|------------------|
| <30               | 14 045            | 2474 (17.6)      |
| 30 - <40          | 10 710            | 2158 (20.1)      |
| 40 - <50          | 9504              | 2075 (21.8)      |
| 50 - <60          | 11 633            | 3443 (29.6)      |
| ≥ 60              | 4565              | 1560 (34.2)      |
| Total             | 50 457            | 11 710 (23.2)    |

\* n=15 unknown or non-binary sex
